# Supplementary material for: Binding characteristics of pyrrole-scaffold hepatitis B virus capsid inhibitors and identification of novel potent compounds
Source: Royal Society of Chemistry journal article supplement (doi:10.1039/d3ra04720b), 2023-01-01
Supplement: d3ra04720b1.pdf [file d3ra04720b1.pdf]

# Binding Characteristics of Pyrrole-scaffold Hepatitis B Virus Capsid Inhibitors and Identification of Novel Potent Compounds

*Tanachote Ruengsatra<sup>1</sup>, Arthitaya Meeprasert<sup>1</sup>, Eakkaphon Rattanangkool<sup>1</sup>, Sirikan Deesiri<sup>1</sup>,  
Jakkrit Srisa<sup>1</sup>, Udomsak Udomnilobol<sup>1</sup>, Wilasinee Dunkoksung<sup>1</sup>, Natthaya Chuaypen<sup>1,2</sup>,  
Rattanaporn Kiatbumrung<sup>1,2</sup>, Pisit Tangkijvanich<sup>1,2</sup>, Sornkanok Vimolmangkang<sup>3</sup>, Khanitha  
Pudhom<sup>4</sup>, and Thomayant Prueksaritanont<sup>1</sup>\*□□*

<sup>1</sup>Chulalongkorn University Drug Discovery and Drug Development Research Center  
(Chula4DR), Chulalongkorn University, 254 Phayathai Rd., Pathumwan, Bangkok 10330,  
Thailand.

<sup>2</sup>Center of Excellence in Hepatitis and Liver Cancer, Department of Biochemistry, Faculty of  
Medicine; <sup>3</sup>Department of Pharmacognosy and Pharmaceutical Botany; and <sup>4</sup>Department of  
Chemistry, Faculty of Science, Chulalongkorn University, 1873 Rama 4 Rd, Pathumwan, Bangkok  
10330, Thailand.

\*Corresponding author. Email address: thomayant.p@pharm.chula.ac.th

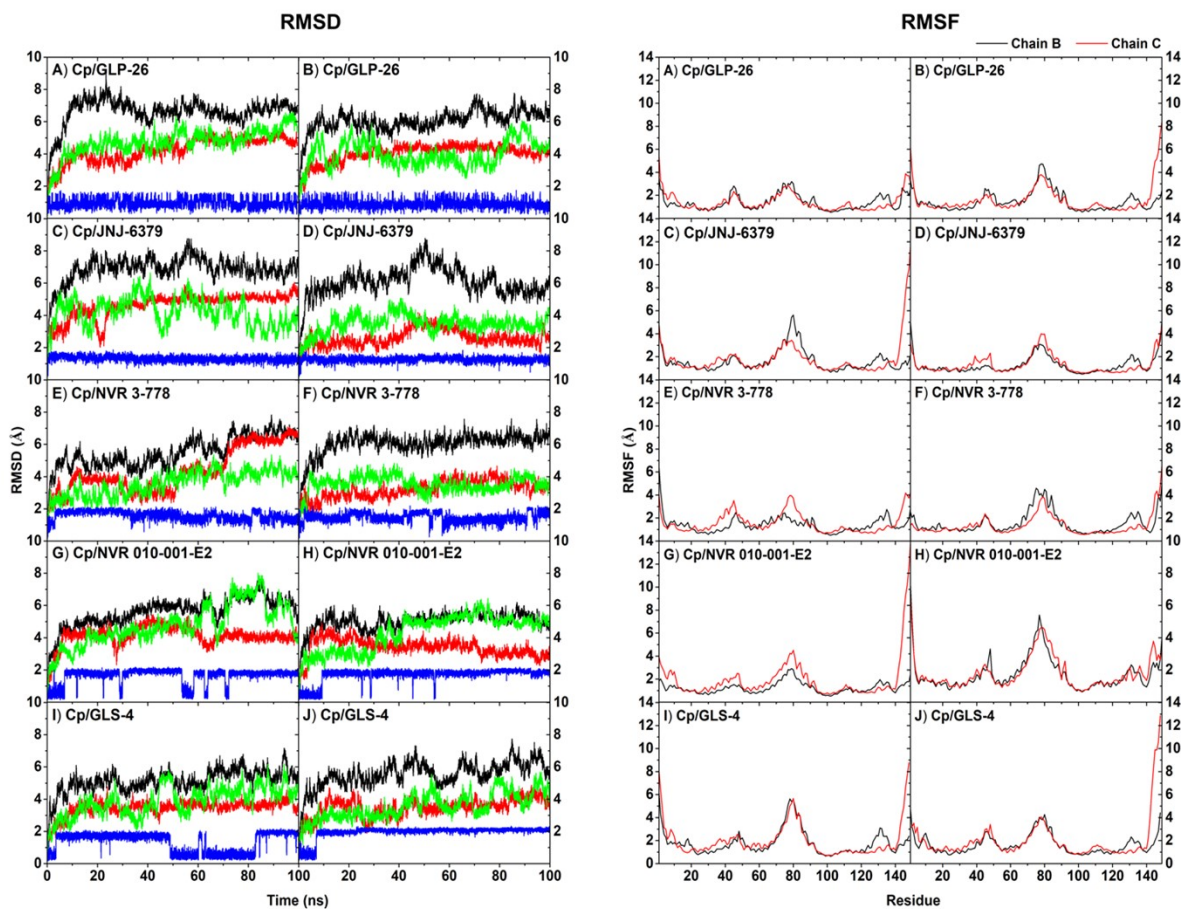

**Figure S1.** (Left) RMSDs for the heavy atom compared to their starting structures of the HBV Cp dimer complexed with A-B) GLP-26, C-D) JNJ-6379, E-F) NVR 3-778, G-H) NVR 010-001-E2, and I-J) GLS-4 (black = global structure, red = chain B backbone, green = chain C backbone, and blue = ligand). (Right) RMSFs of alpha-carbons in the HBV Cp dimer (black = chain B, red = chain C) complexed with A-B) GLP-26, C-D) JNJ-6379, E-F) NVR 3-778, G-H) NVR 010-001-E2, and I-J) GLS-4. Two independent simulations are illustrated for each protein-ligand complex.

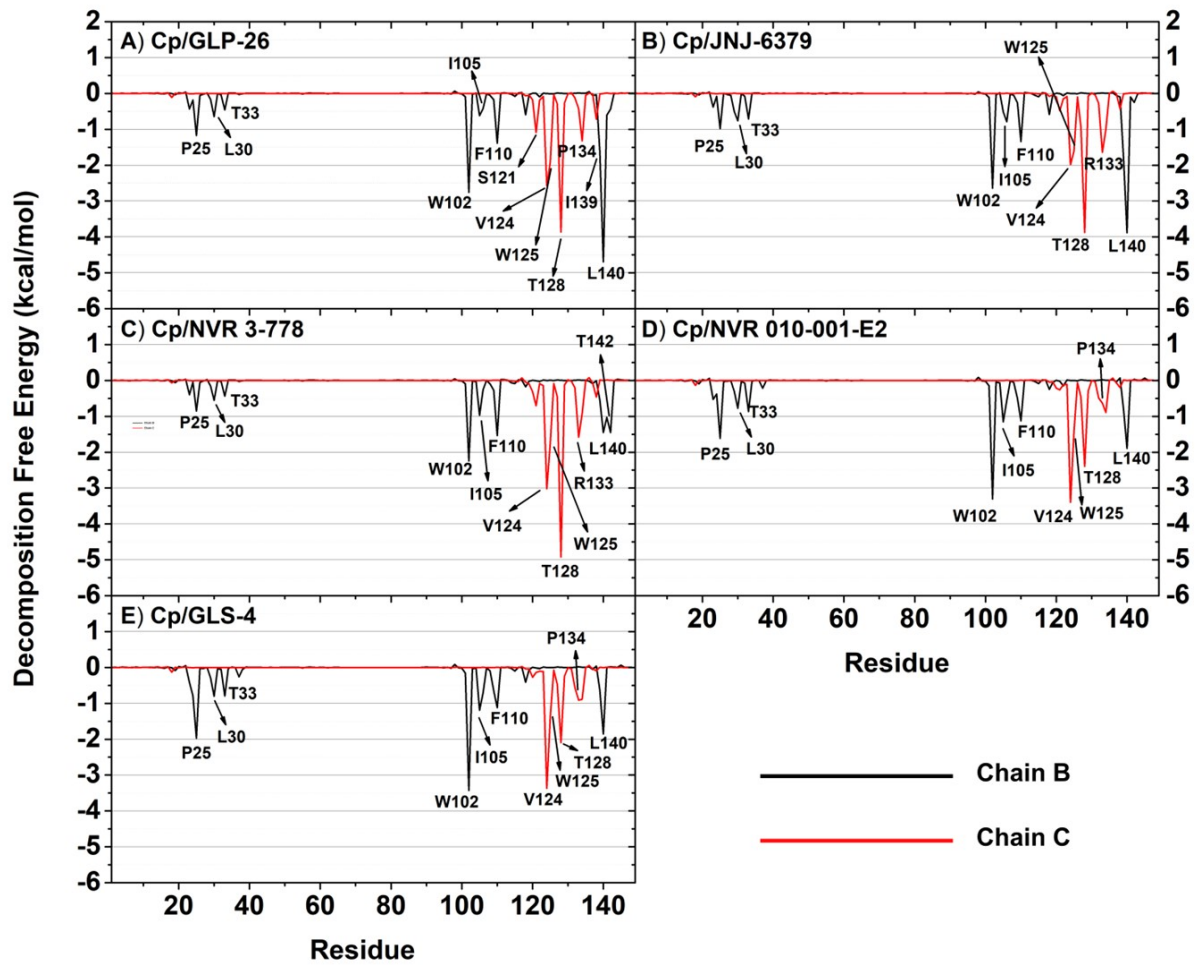

**Figure S2.**  $\Delta G_{bind}^{residue}$  of the HBV Cp dimer complexed with A) GLP-26, B) JNJ-6379, C) NVR 3-778, D) NVR 010-001-E2, and E) GLS-4.

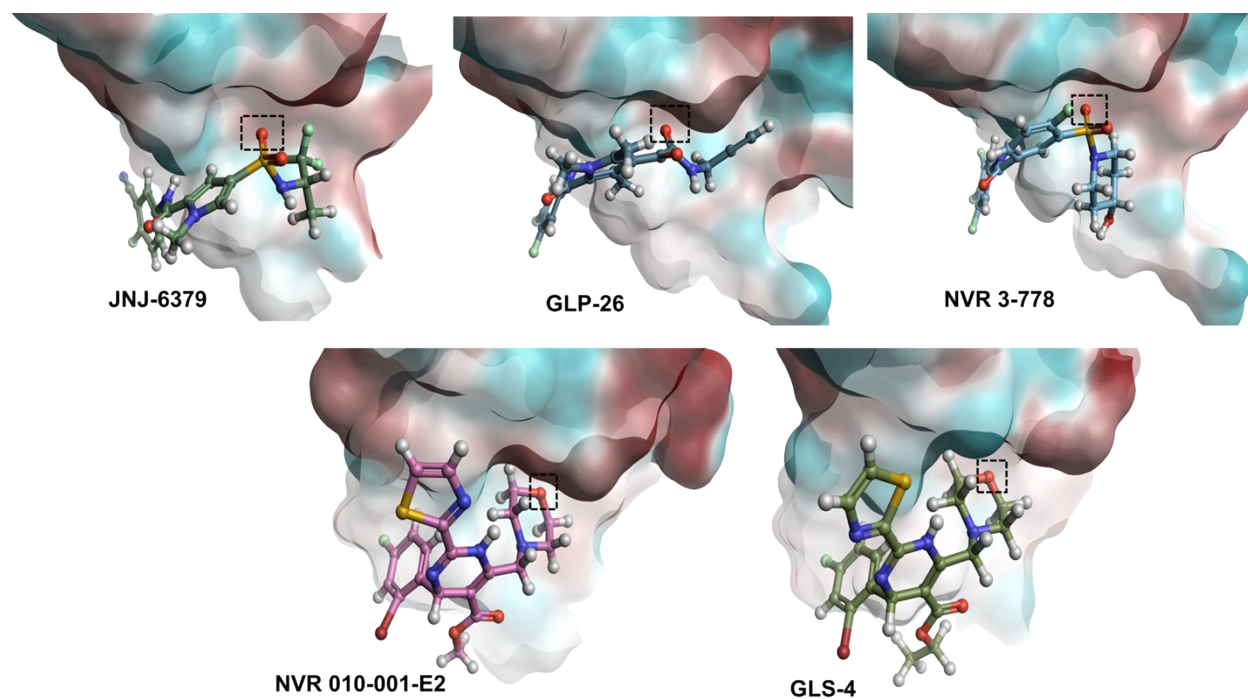

**Figure S3.** ESP surface of five representative ligand-EBV capsid protein (chain C) complexes (red surface = positive, blue surface = negative). The black rectangle highlights the electronegative atom of the ligands that contacted the positive ESP surface (residues W125<sub>C</sub>, R133<sub>C</sub>, and P134<sub>C</sub>).

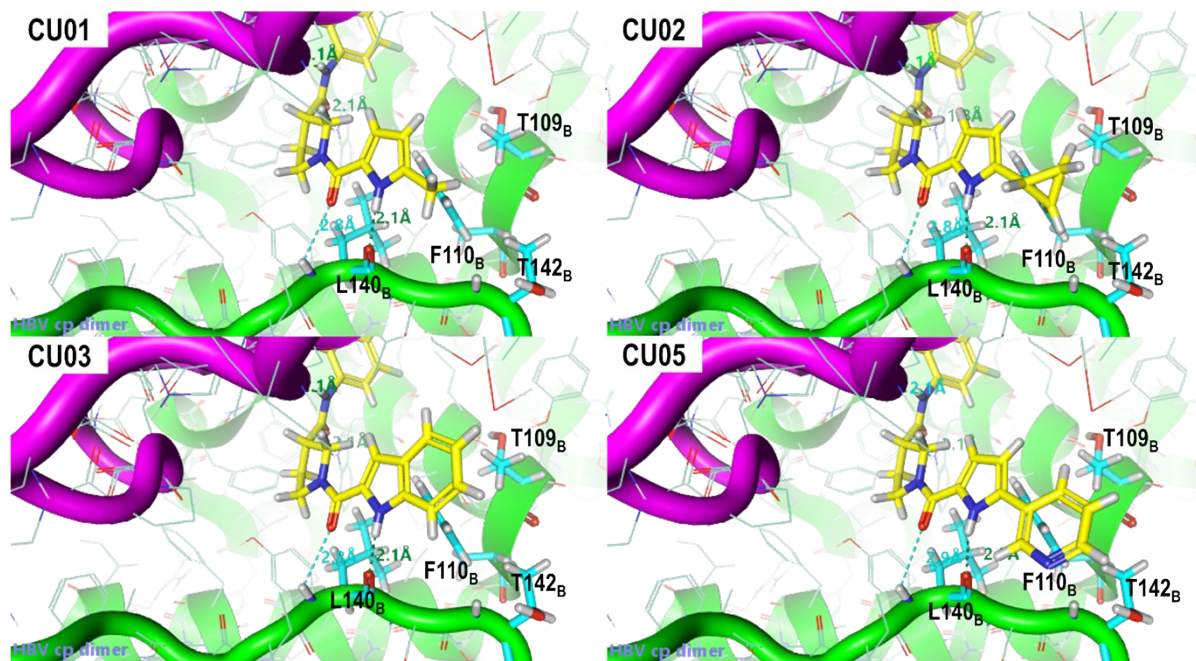

**Figure S4.** The predicted conformation of CU01-03 and CU05 in HBV capsid dimer interface

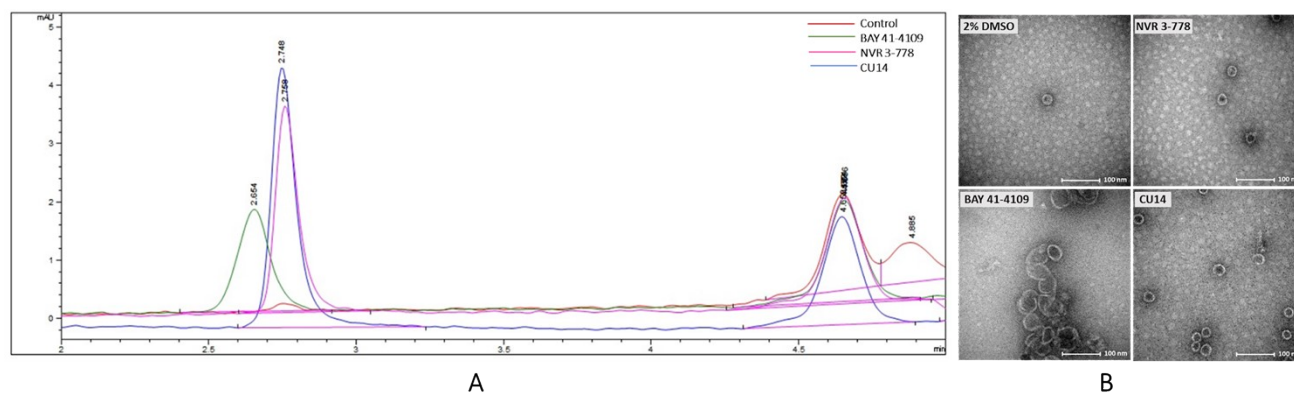

**Figure S5.** Effects of representative compound CU14 on HBV capsid assembly, determined by size exclusion chromatography (SEC, A) and transmission electron microscopy (TEM, B).

**Table S1.**  $\Delta G_{bind}^{residue}$  (kcal/mol) of the essential binding residues in HBV Cp dimer in complexation with five representative inhibitors.

| Residues                                                                | GLP-26   |        | JNJ-6379 |        | NVR 3-778 |        | NVR 010-001-E2 |        | GLS-4    |        | Binding region  |
|-------------------------------------------------------------------------|----------|--------|----------|--------|-----------|--------|----------------|--------|----------|--------|-----------------|
|                                                                         | Nonpolar | Polar  | Nonpolar | Polar  | Nonpolar  | Polar  | Nonpolar       | Polar  | Nonpolar | Polar  |                 |
| <b>P25<sub>B</sub></b>                                                  | -1.288   | 0.117  | -1.086   | 0.104  | -1.025    | 0.169  | -1.715         | 0.104  | -2.064   | 0.092  | L1              |
| <b>W102<sub>B</sub></b>                                                 | -1.320   | -1.439 | -1.783   | -0.857 | -1.499    | -0.747 | -2.323         | -0.977 | -2.269   | -1.155 | L1-L2           |
| <b>I105<sub>B</sub></b>                                                 | -0.674   | 0.053  | -0.682   | 0.164  | -0.736    | -0.231 | -1.040         | -0.113 | -1.141   | -0.053 | L1              |
| <b>F110<sub>B</sub></b>                                                 | -1.539   | 0.155  | -1.724   | 0.385  | -1.839    | 0.306  | -1.347         | 0.221  | -1.372   | 0.251  | L2              |
| <b>S121<sub>C</sub></b>                                                 | -1.105   | 0.021  | -0.908   | 0.425  | -1.131    | 0.425  | -0.605         | 0.344  | -0.369   | 0.233  | L3              |
| <b>V124<sub>C</sub></b>                                                 | -2.625   | 0.055  | -2.232   | 0.246  | -2.839    | -0.177 | -3.373         | -0.023 | -3.427   | 0.062  | L1              |
| <b>W125<sub>C</sub></b>                                                 | -1.630   | -0.285 | -1.584   | -0.024 | -1.843    | 0.102  | -1.389         | -0.029 | -1.321   | -0.054 | L3              |
| <b>T128<sub>C</sub></b>                                                 | -2.753   | -1.107 | -2.152   | -1.726 | -2.337    | -2.581 | -2.356         | -0.037 | -2.167   | 0.072  | L1-L2           |
| <b>R133<sub>C</sub></b>                                                 | -0.743   | 0.315  | -1.107   | -0.533 | -1.013    | -0.565 | -0.815         | 0.183  | -1.022   | 0.112  | L3              |
| <b>P134<sub>C</sub></b>                                                 | -1.536   | 0.218  | -1.114   | 0.114  | -0.984    | 0.059  | -0.981         | 0.086  | -0.942   | 0.055  | L3              |
| <b>I139<sub>B</sub></b>                                                 | -1.293   | -0.339 | -1.206   | -0.606 | -0.571    | 0.025  | -0.900         | 0.094  | -0.758   | 0.120  | L3              |
| <b>L140<sub>B</sub></b>                                                 | -3.075   | -1.617 | -2.719   | -1.160 | -2.704    | 1.254  | -2.567         | 0.671  | -2.594   | 0.738  | L2-L3           |
| <b>S141<sub>B</sub></b>                                                 | -0.920   | 0.311  | -0.768   | 0.671  | -0.915    | -0.115 | -0.166         | 0.149  | -0.161   | 0.164  | L3              |
| <b>T142<sub>B</sub></b>                                                 | -0.472   | 0.033  | -0.467   | 0.219  | -0.199    | -1.251 | -0.028         | 0.059  | -0.040   | 0.061  | L3              |
| <b>W125<sub>C</sub>,<br/>R133<sub>C</sub>, and<br/>P134<sub>C</sub></b> | -3.91    | 0.25   | -3.81    | -0.443 | -3.84     | -0.40  | -3.19          | 0.24   | -3.29    | 0.113  | L3 small pocket |

Polar ( $\Delta E_{ele} + \Delta G_{polar}$ ) and nonpolar ( $\Delta E_{vdW} + \Delta G_{nonpolar}$ ) energy contributions were analyzed for selected residues.

## **METABOLITE IDENTIFICATION**

### *Identification of metabolic soft spots using high resolution mass spectrometry*

The metabolite identification was conducted using the AB Sciex X500B Q-TOF LC-MS/MS system. The samples were chromatographically separated using the Exion LC AD100 system with a Phenomenex Kinetex® C-18, 1.7  $\mu\text{m}$ , 50 $\times$ 2.1 mm analytical column. The mobile phases consisted of water and acetonitrile, both fortified with 0.1% formic acid, and were used as phase A and B, respectively. The flow rate was set at 0.4 mL/min using a 2-step linear gradient from 2% to 65% B for 4 min, followed by ramping to 95% for 0.5 min. The Turbo V™ ion source was operated in the electrospray positive ionization mode under following conditions: curtain gas at 40 psi, heating gas 1 at 40 psi, nebulizing gas 2 at 40 psi, temperature at 450 °C, ion spray voltage floating at 4.5 kV, and declustering potential at 80 V. Mass calibration was performed every 5 sample injections using a standard calibration solution. The TOF MS scan and product ion (MS/MS) spectra were acquired for the m/z range 50-800.

Dynamic background subtraction and the mass defect filter (MDF) function were enabled. The MDF window was set at  $\pm 40$  mDa, and the mass range was set as  $\pm 40$  Da around the m/z value of the parent ion. An information-dependent data acquisition (IDA) method was used for triggering MS/MS acquisition for the top 6 intense ions using CE spread at  $35 \pm 15$  V. The data were processed and interpreted using SCIEX OS version 1.6 and MetabolitePilot™ version 2.0 software (AB SCIEX, MA, USA).

## Ion chromatograms of parent CU02 and its metabolites

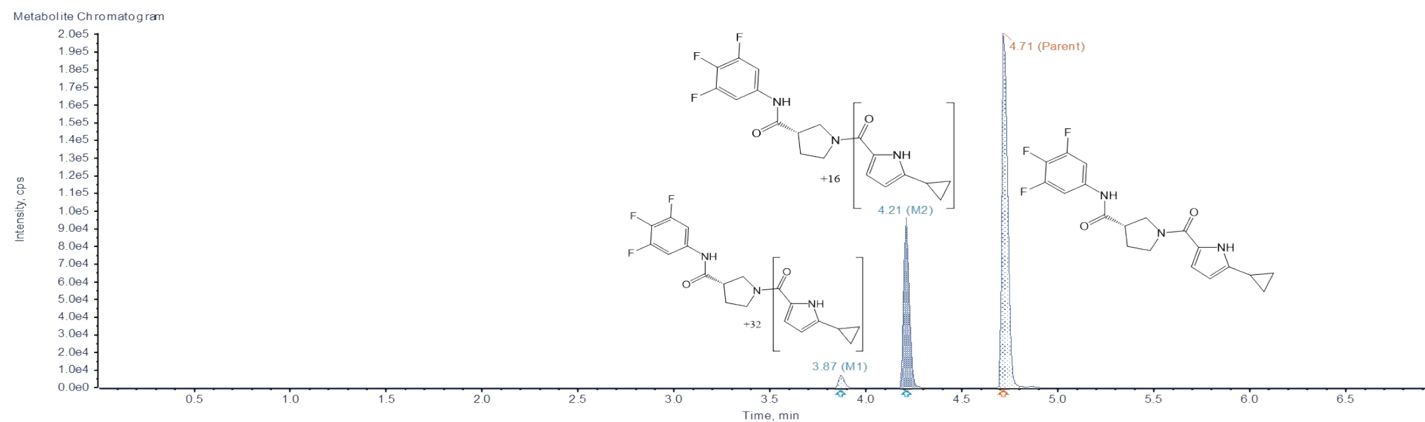

## Structures and fragmentation spectra of parent CU02 and its metabolites

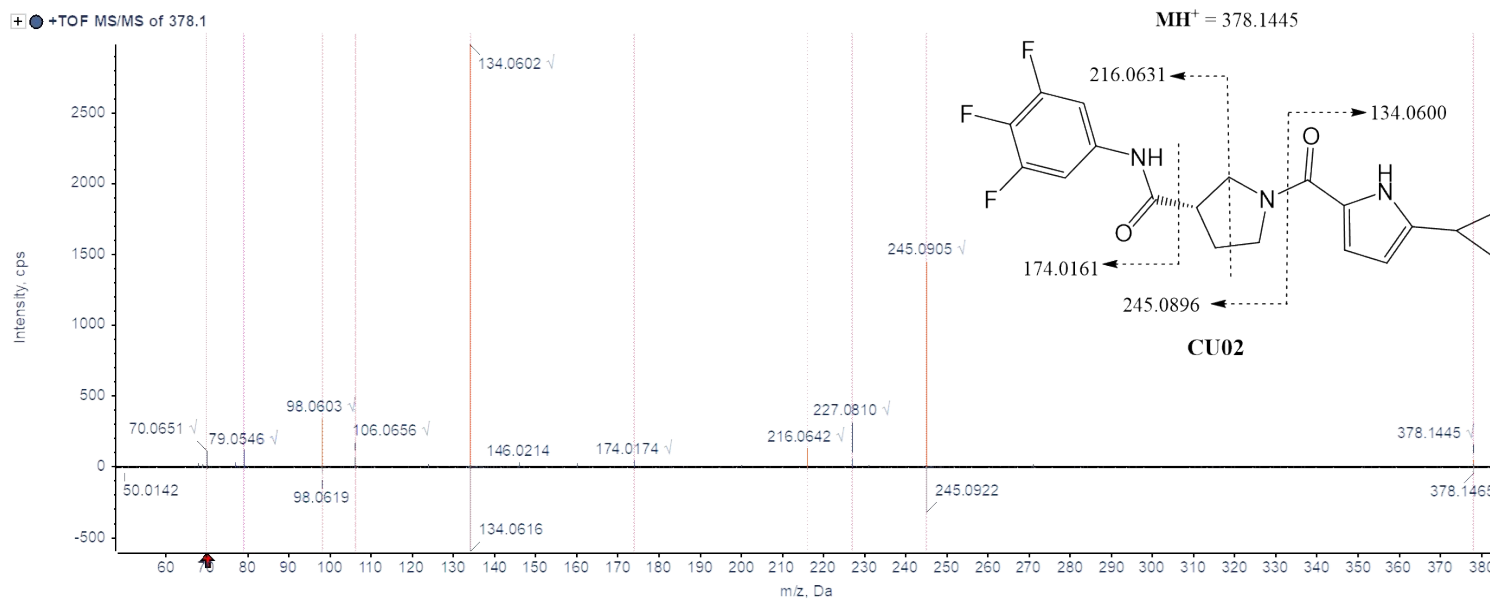



+●+TOF MS/MS of 410.1

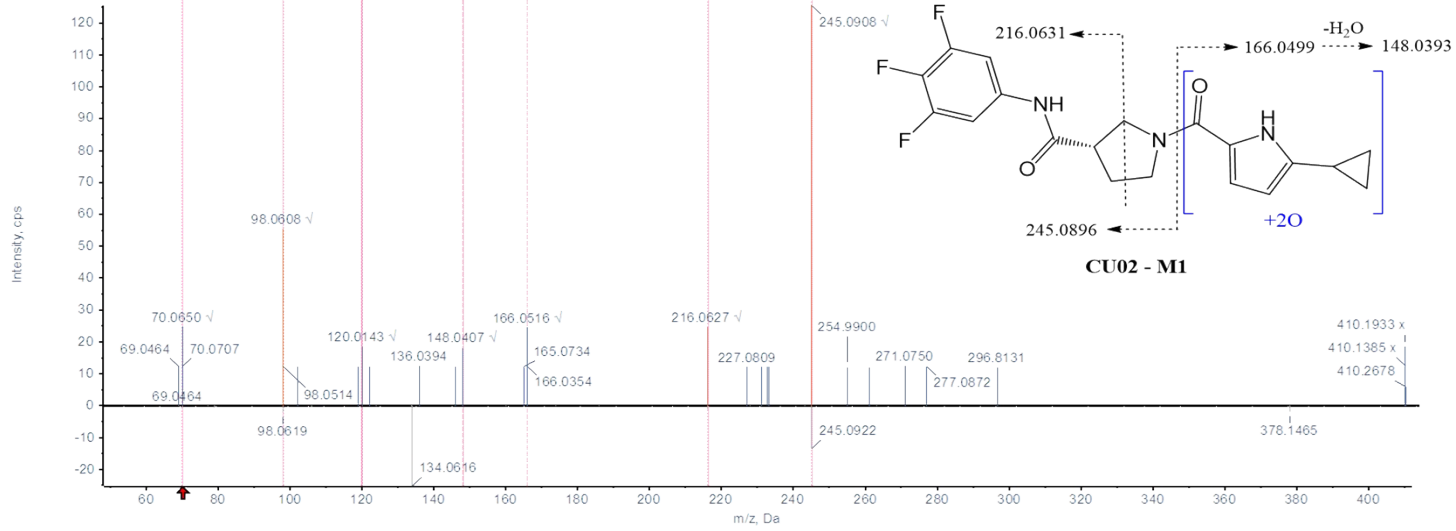

+●+TOF MS/MS of 394.1

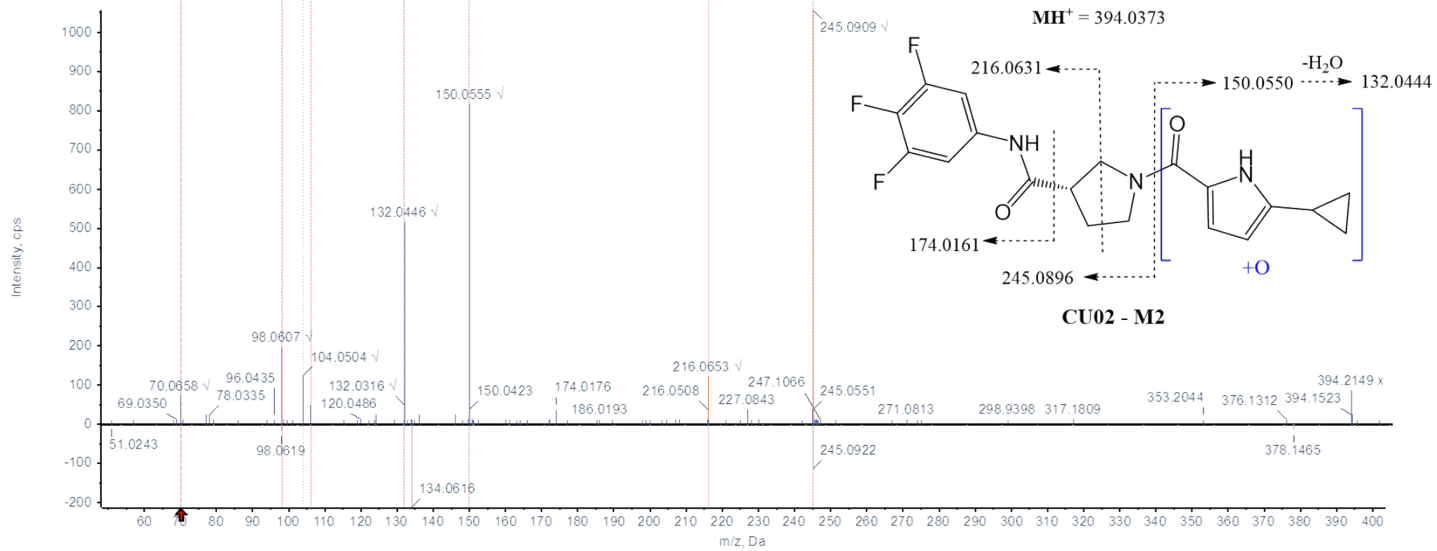

## Ion chromatograms of parent CU03 and its metabolites

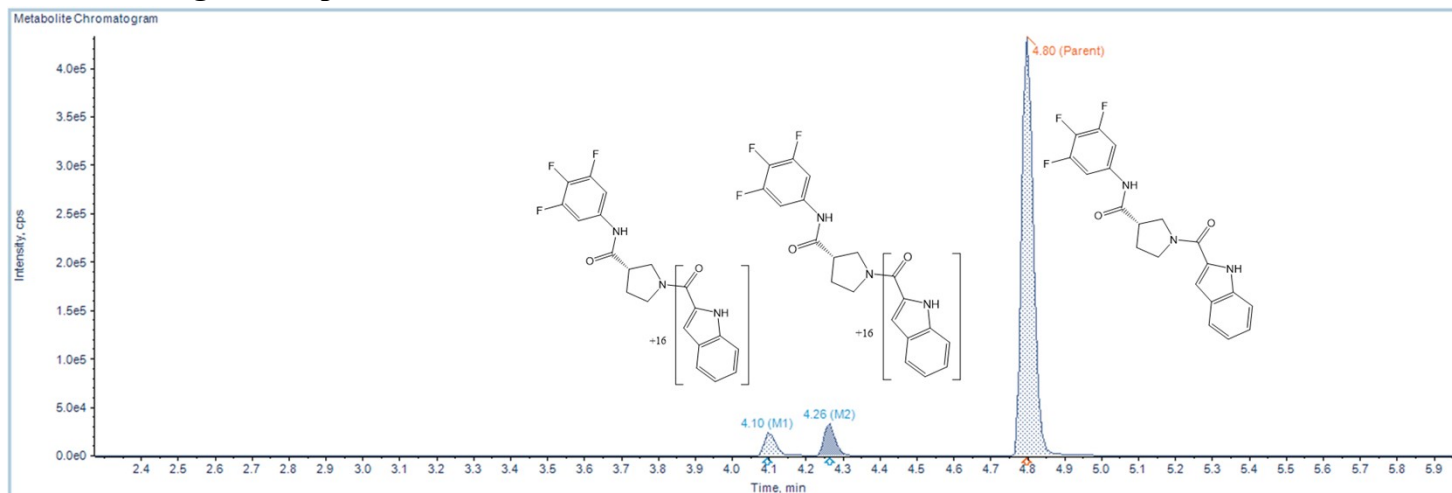

## Structures and fragmentation spectra of parent CU03 and its metabolites

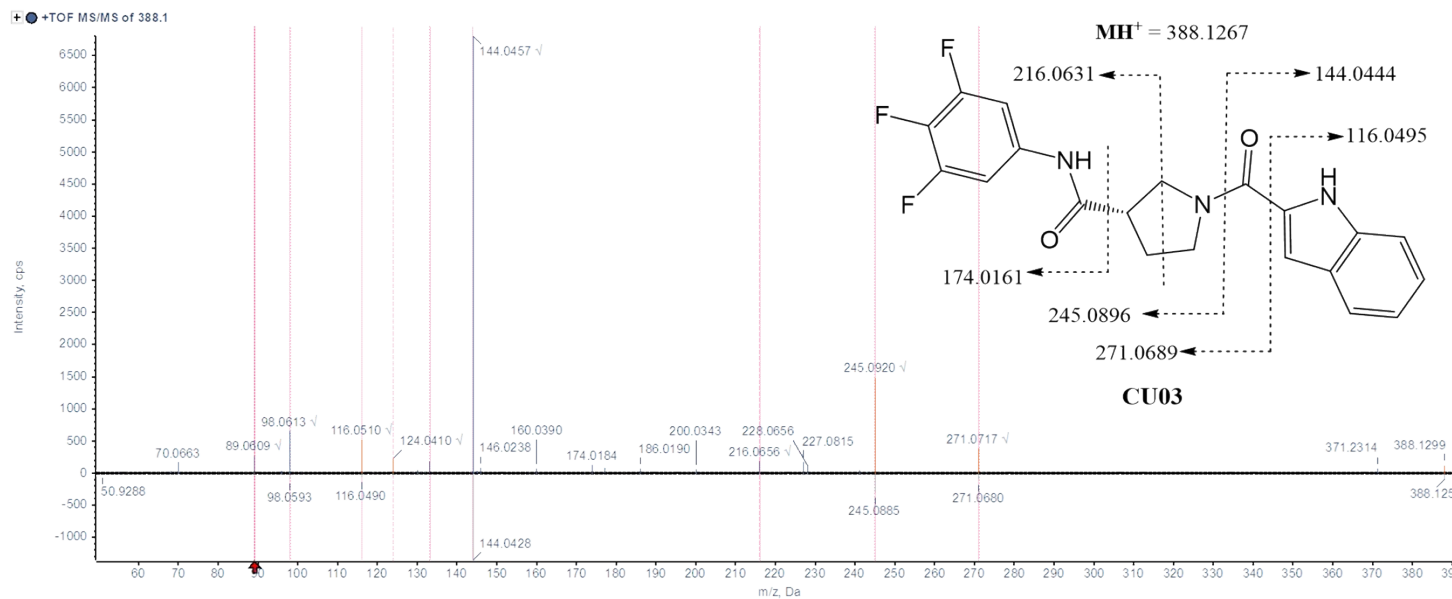

● +TOF MS/MS of 404.1

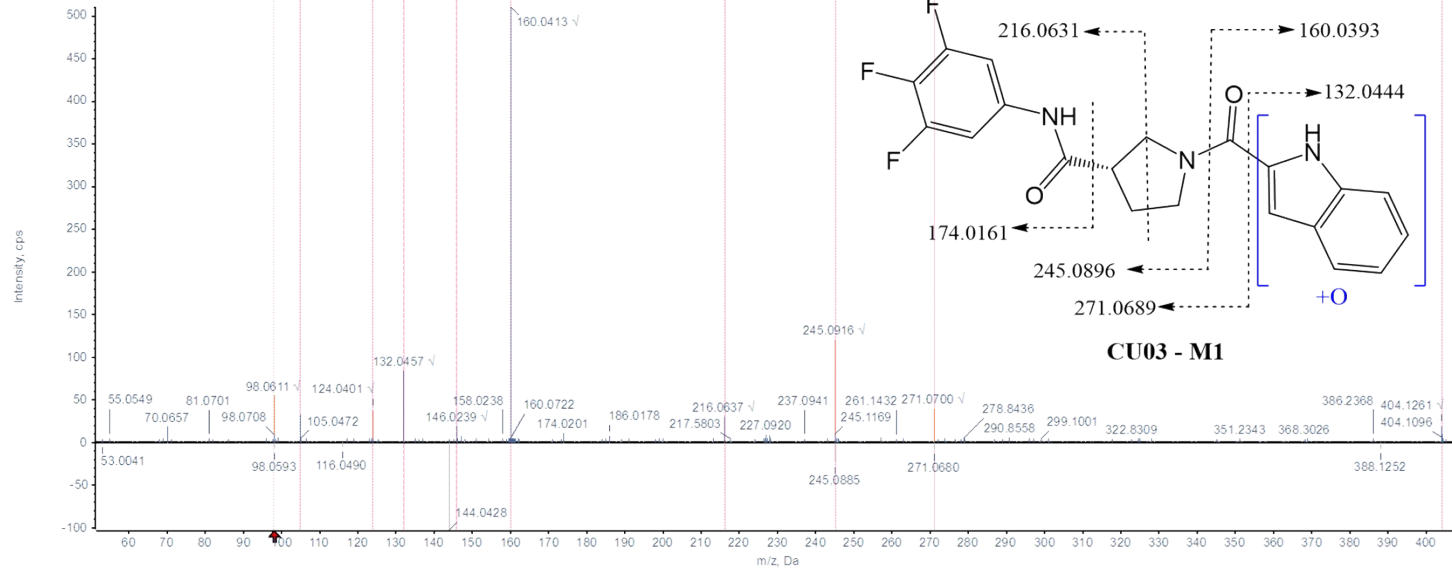

● +TOF MS/MS of 404.1

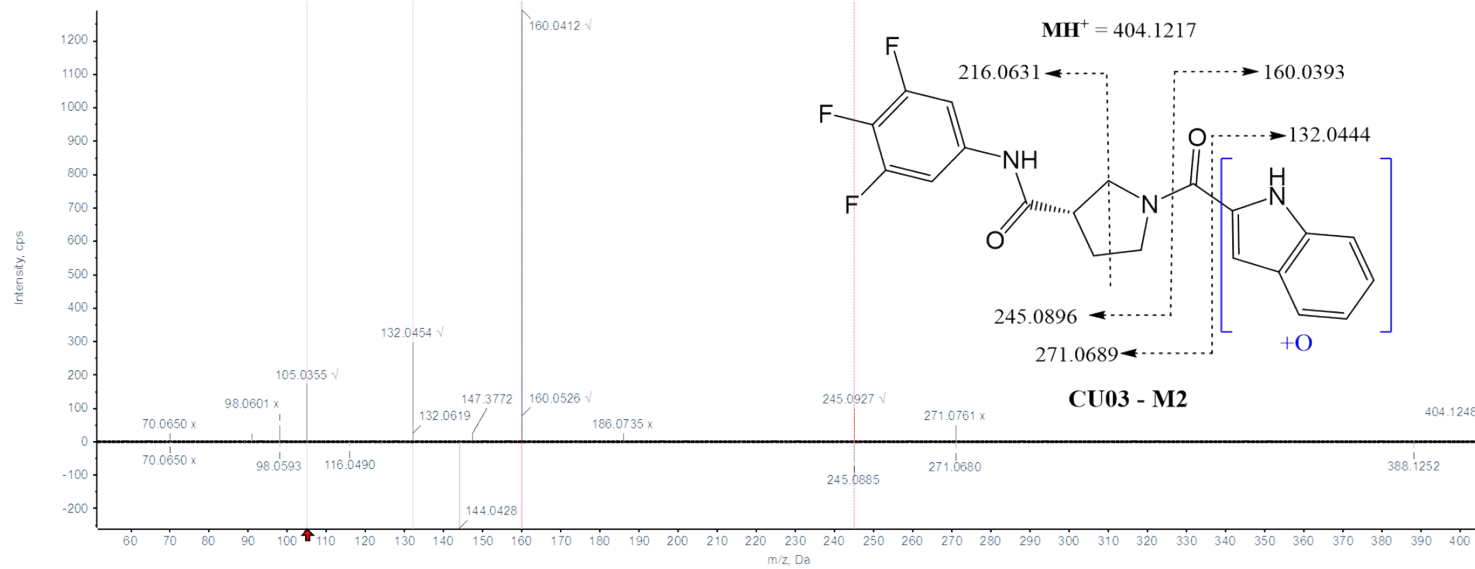

# NMR SPECTRUM OF SYNTHESIZED COMPOUNDS

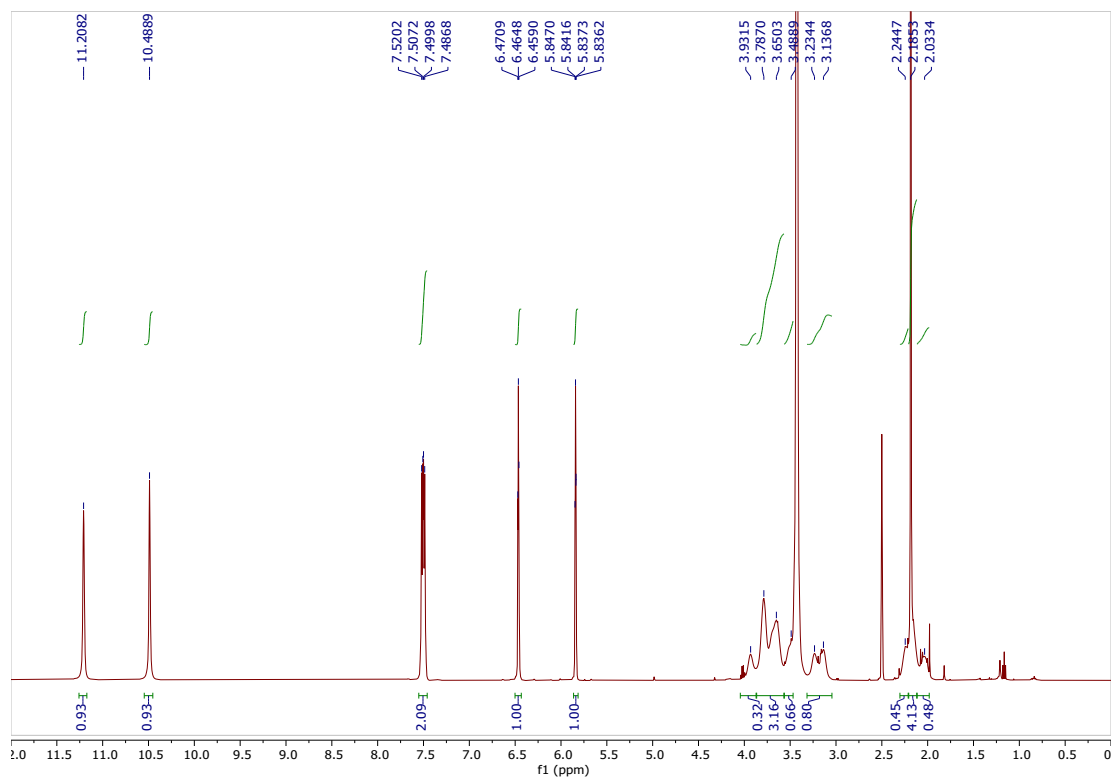

<sup>1</sup>H NMR spectrum of CU01 (DMSO-d<sub>6</sub>)

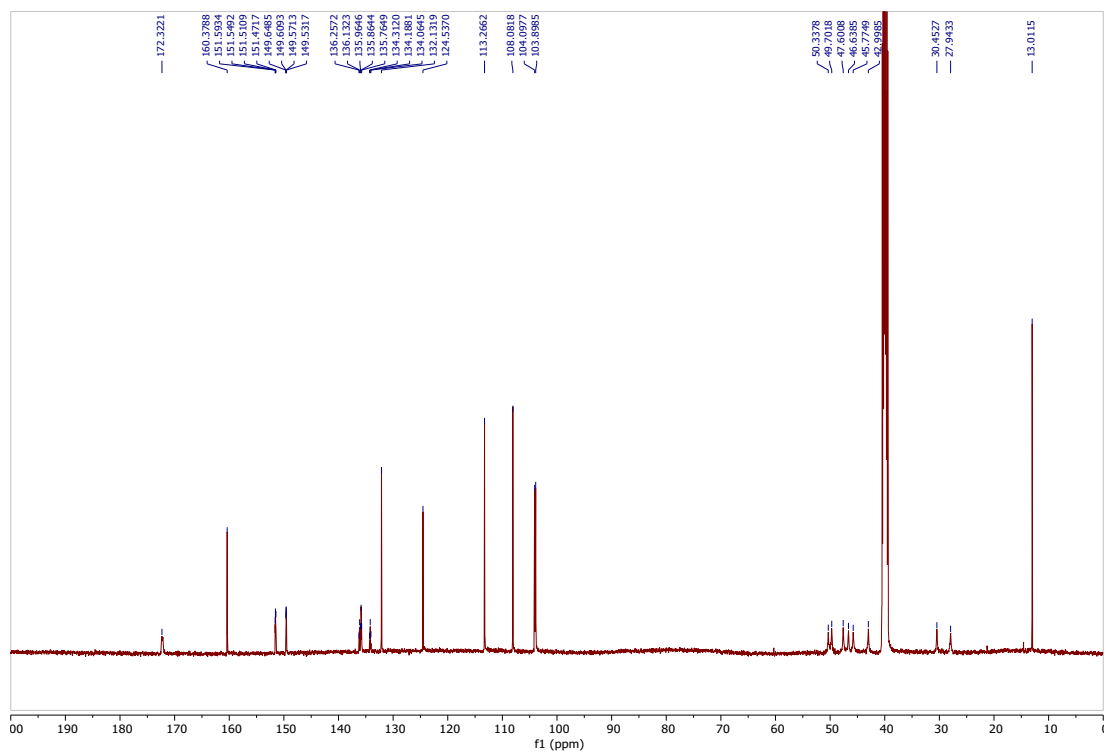

<sup>13</sup>C NMR spectrum of CU01 (DMSO-d<sub>6</sub>)

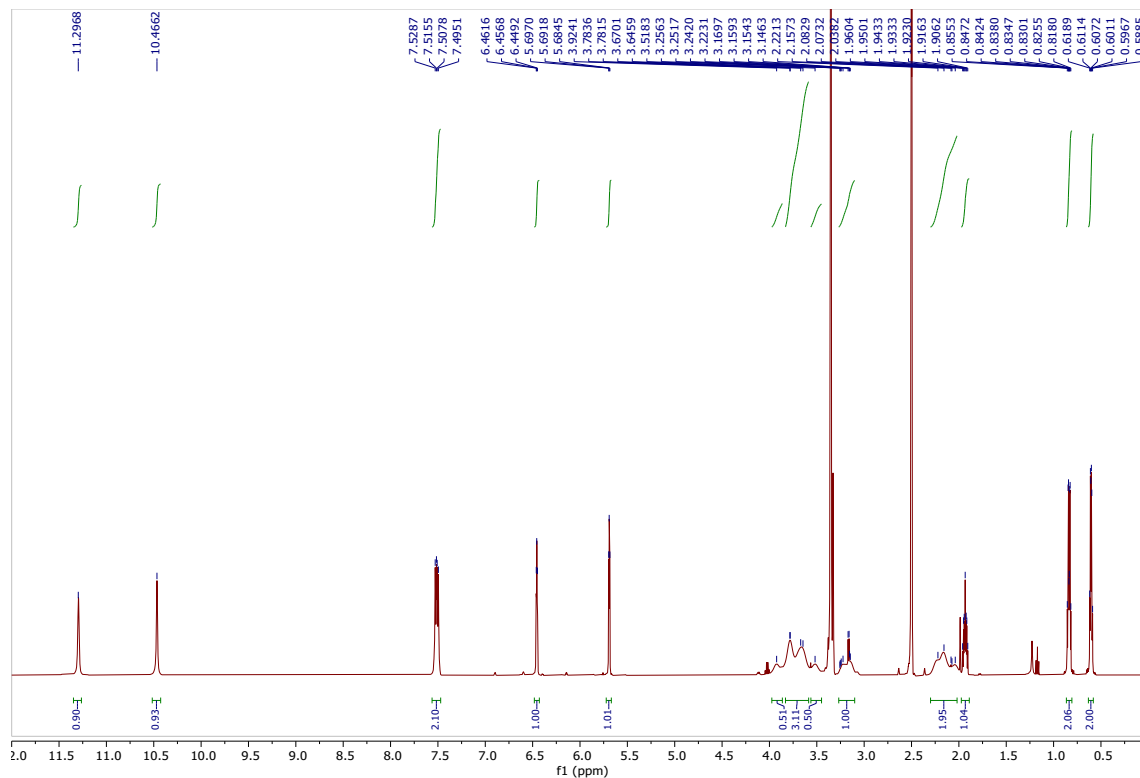

<sup>1</sup>H NMR spectrum of CU02 (DMSO-d<sub>6</sub>)

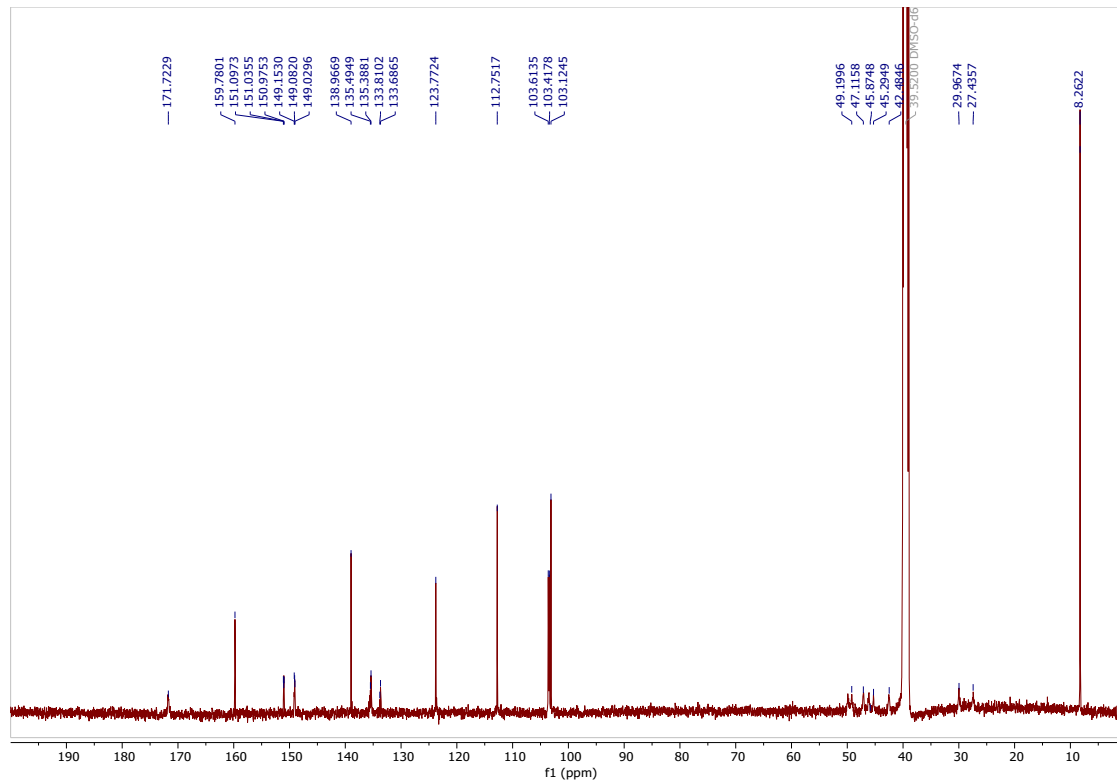

<sup>13</sup>C NMR spectrum of CU02 (DMSO-d<sub>6</sub>)

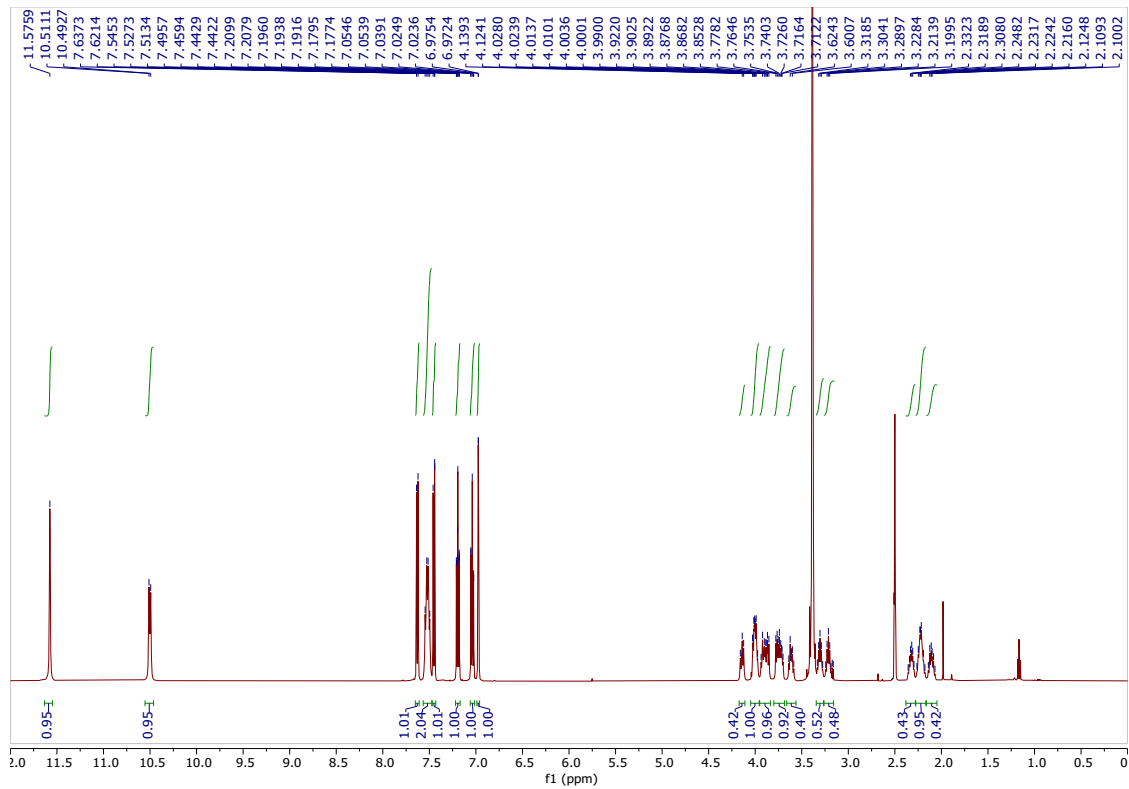

<sup>1</sup>H NMR spectrum of CU03 (DMSO-d<sub>6</sub>)

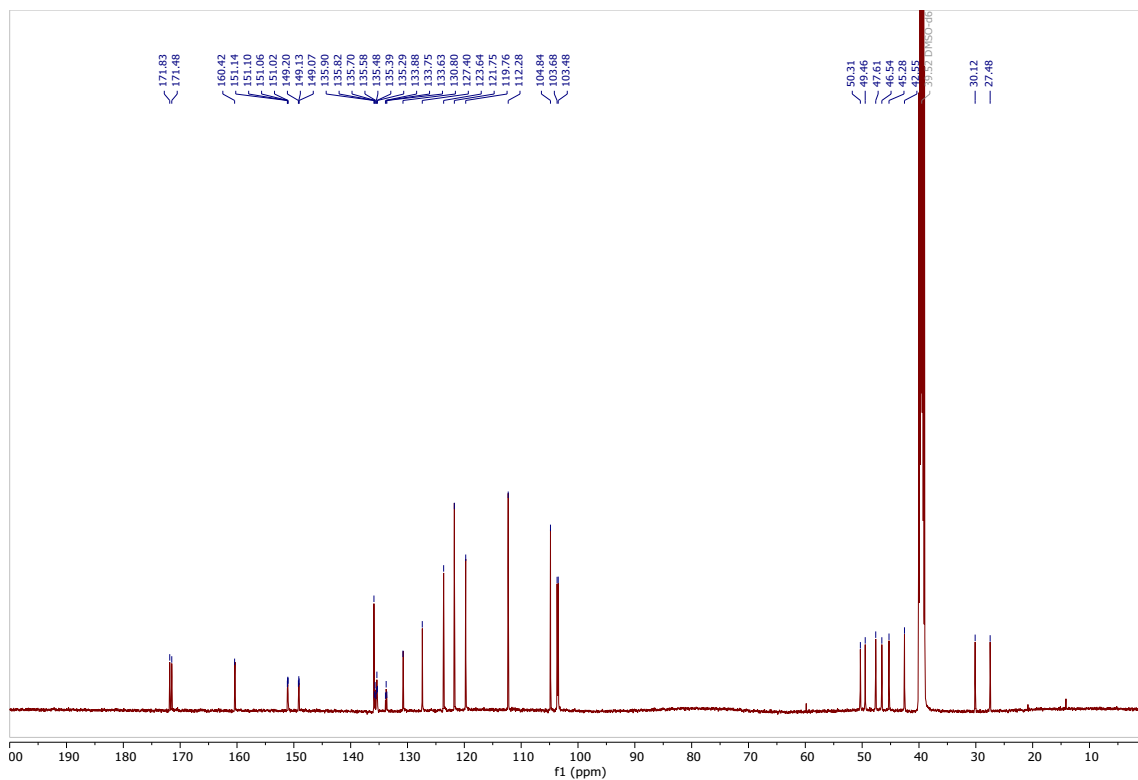

<sup>13</sup>C NMR spectrum of CU03 (DMSO-d<sub>6</sub>)

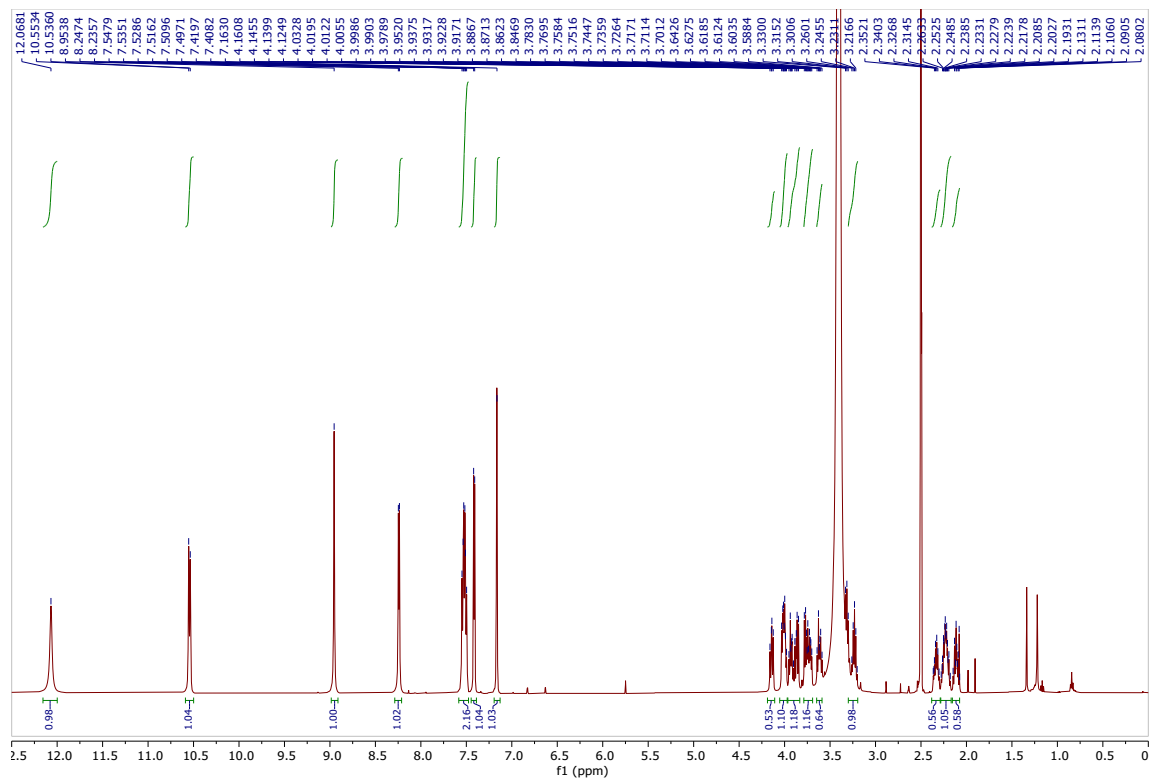

<sup>1</sup>H NMR spectrum of CU04 (DMSO-*d*<sub>6</sub>)

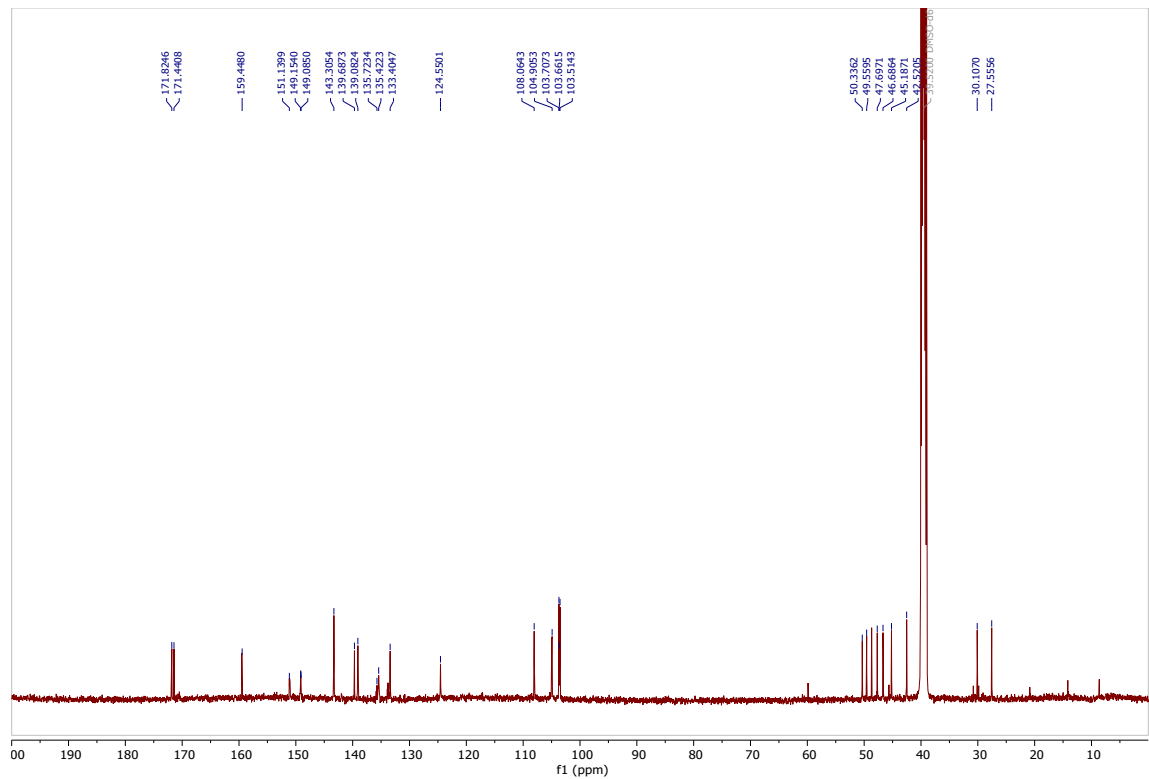

<sup>13</sup>C NMR spectrum of CU04 (DMSO-*d*<sub>6</sub>)

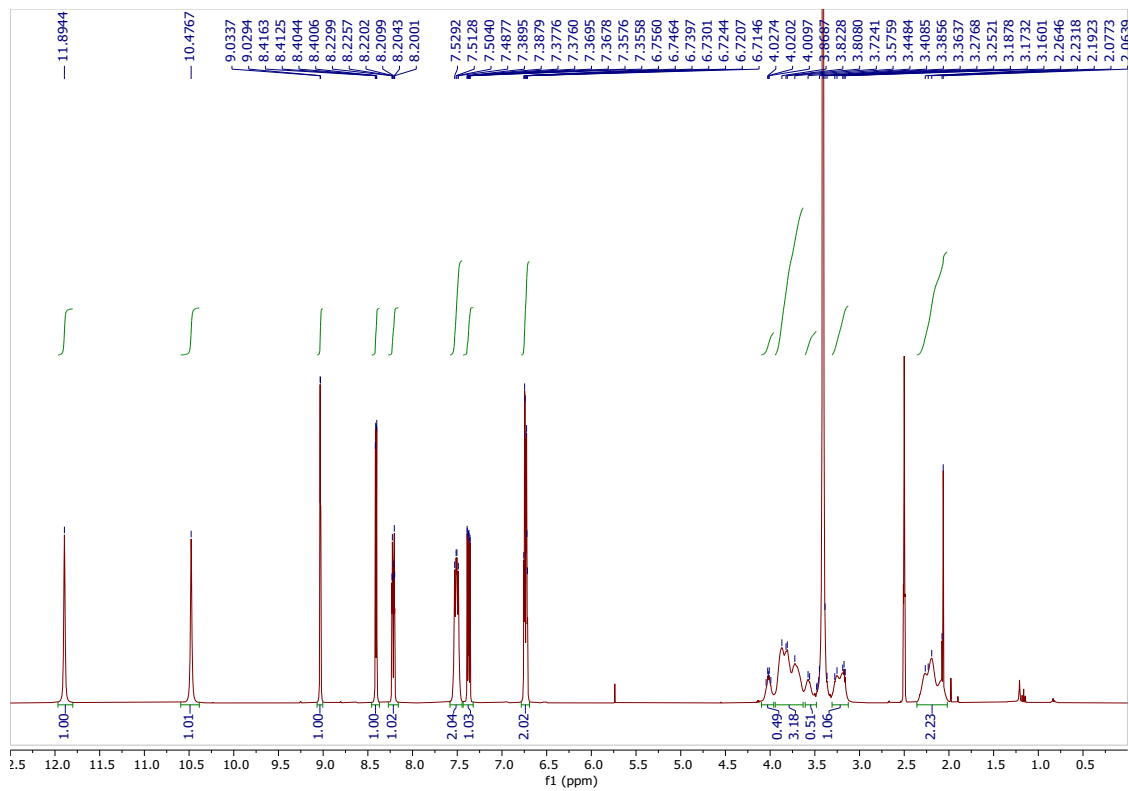

<sup>1</sup>H NMR spectrum of CU05 (DMSO-*d*<sub>6</sub>)

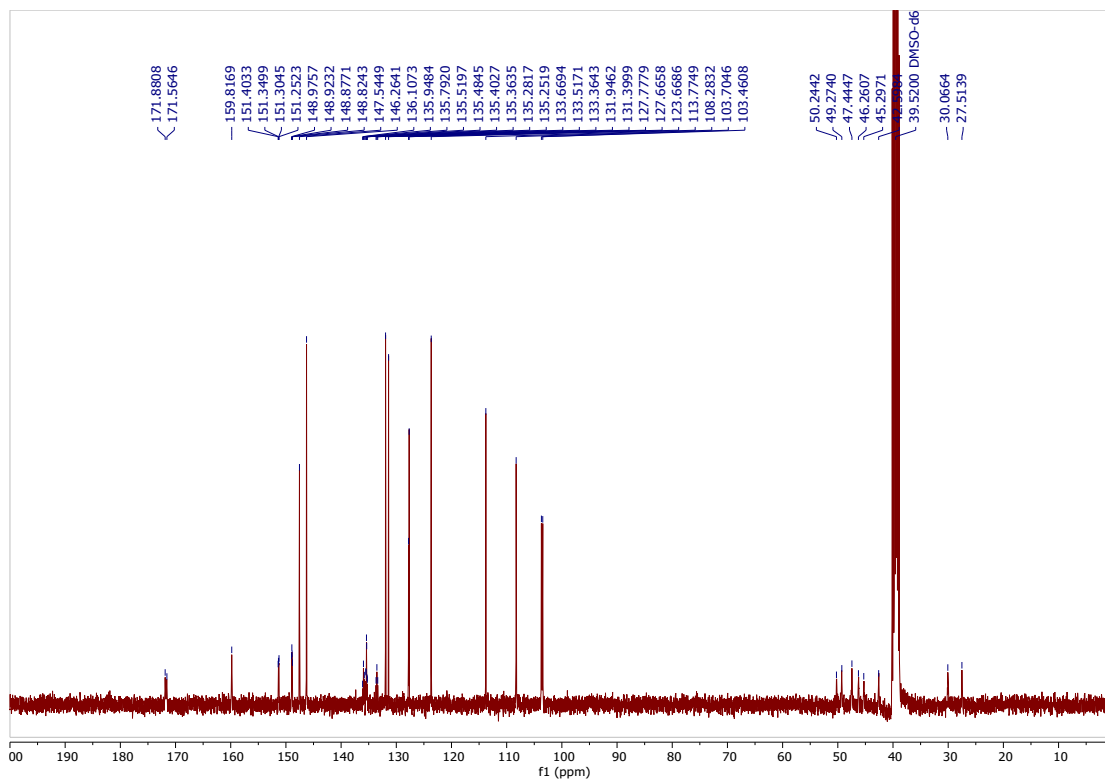

<sup>13</sup>C NMR spectrum of CU05 (DMSO-*d*<sub>6</sub>)



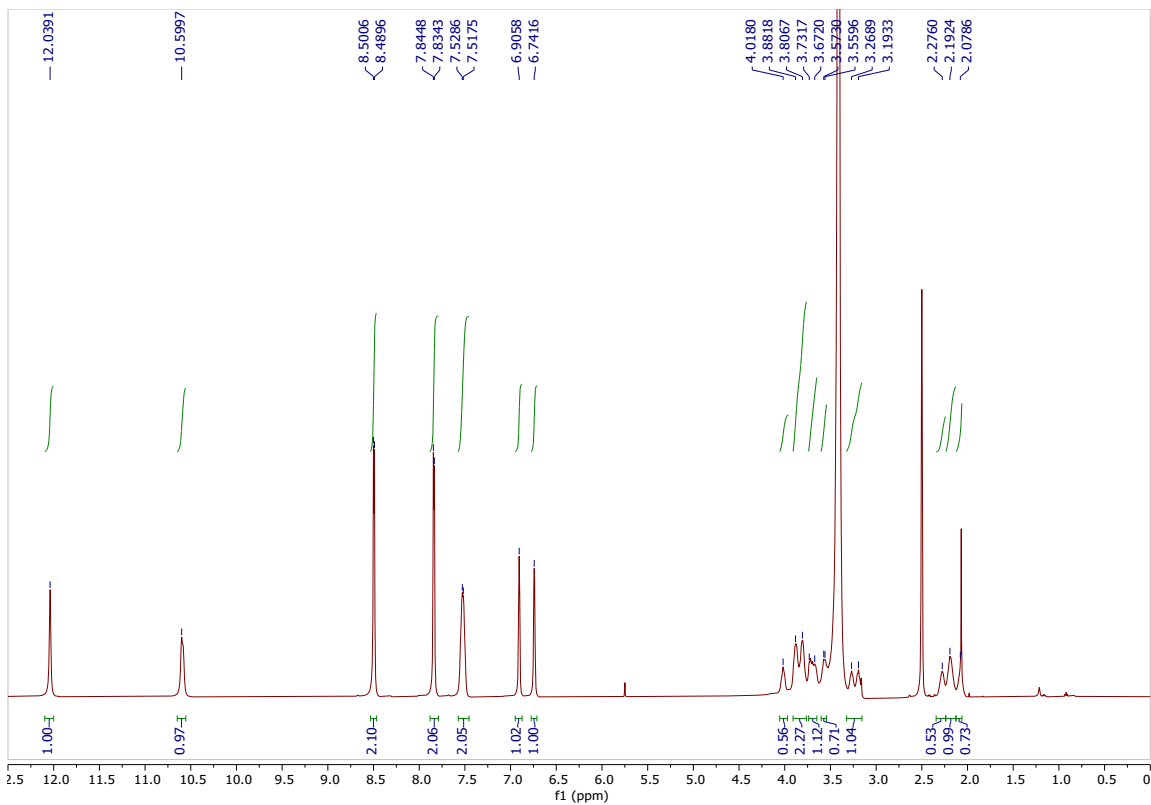

<sup>1</sup>H NMR spectrum of CU06 (DMSO-d<sub>6</sub>)

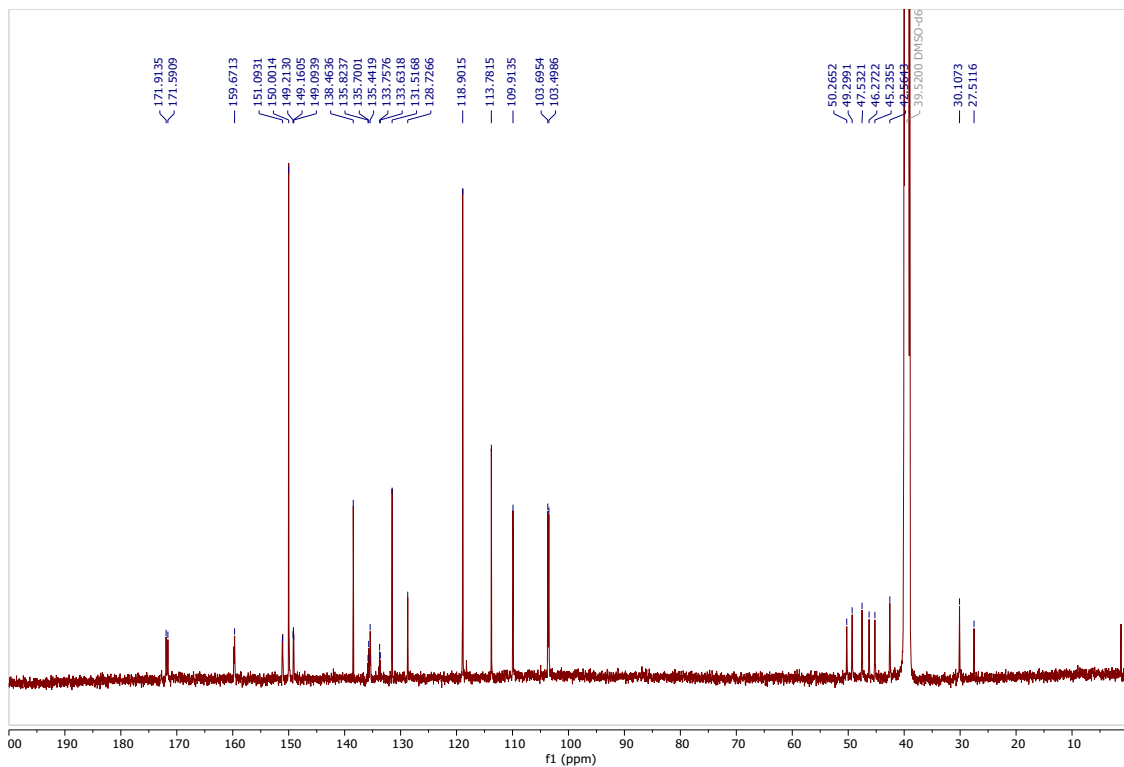

<sup>13</sup>C NMR spectrum of CU06 (DMSO-d<sub>6</sub>)

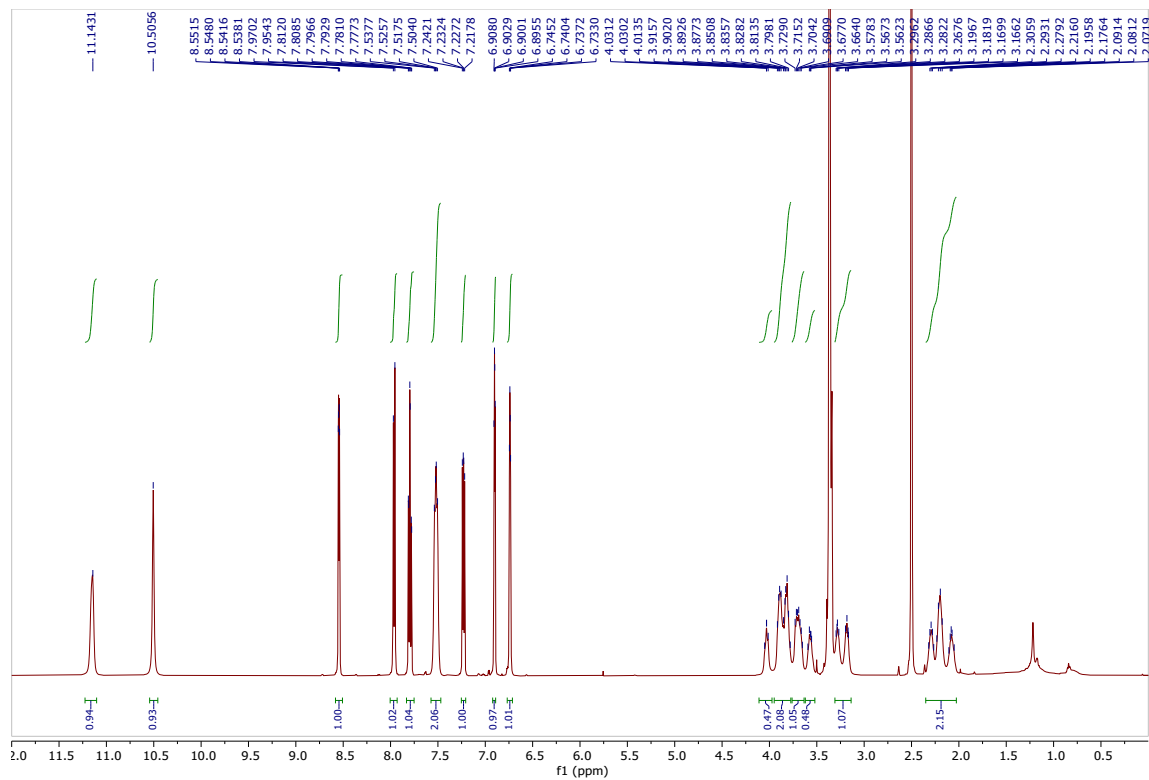

<sup>1</sup>H NMR spectrum of CU07 (DMSO-*d*<sub>6</sub>)

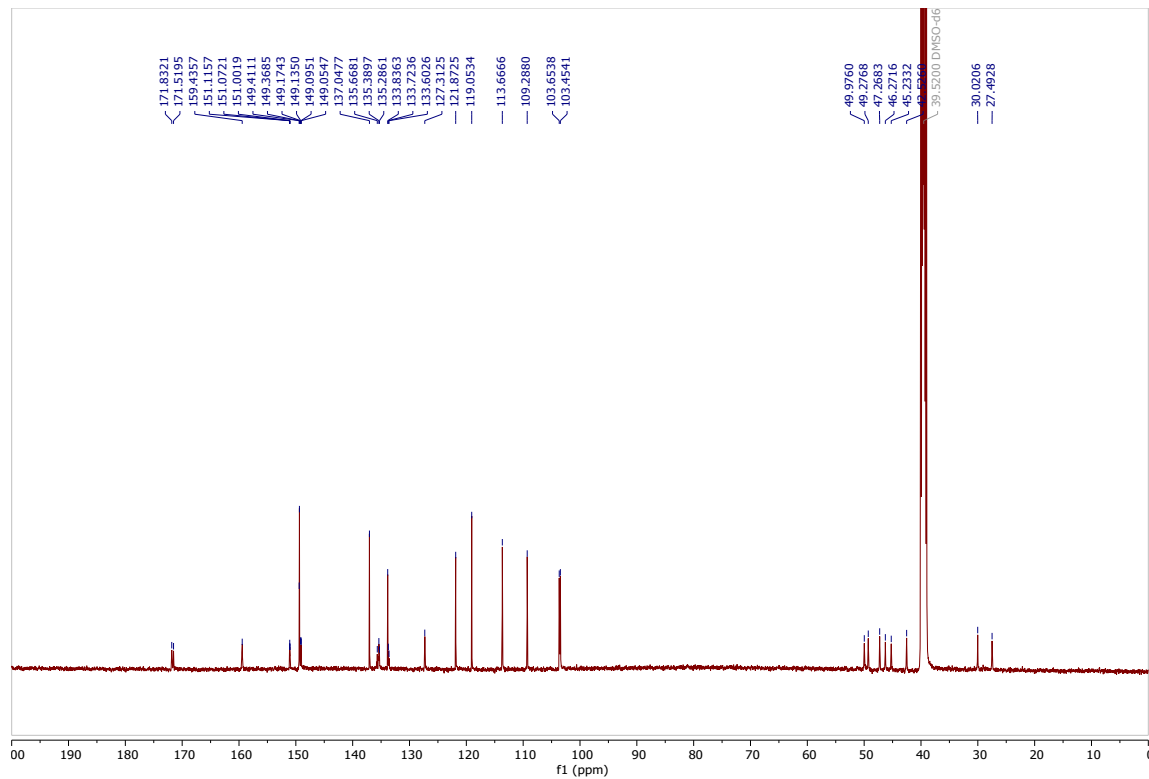

<sup>13</sup>C NMR spectrum of CU07 (DMSO-*d*<sub>6</sub>)

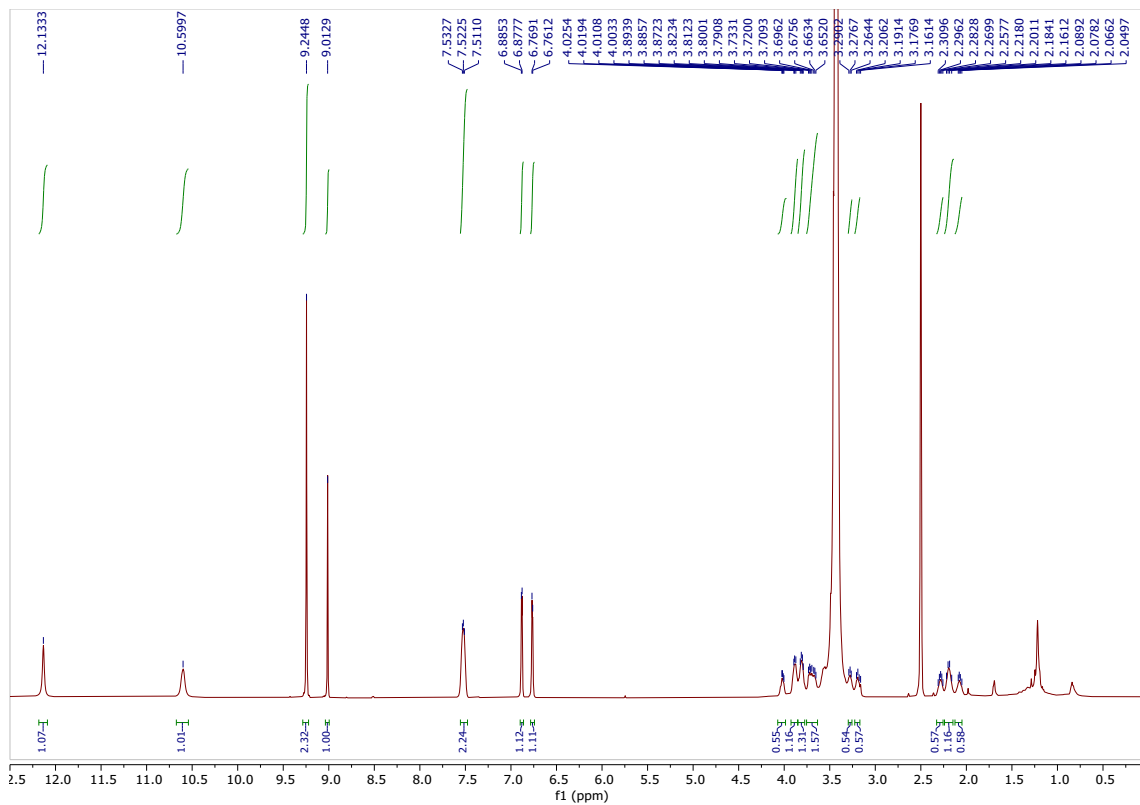

<sup>1</sup>H NMR spectrum of CU08 (DMSO-*d*<sub>6</sub>)

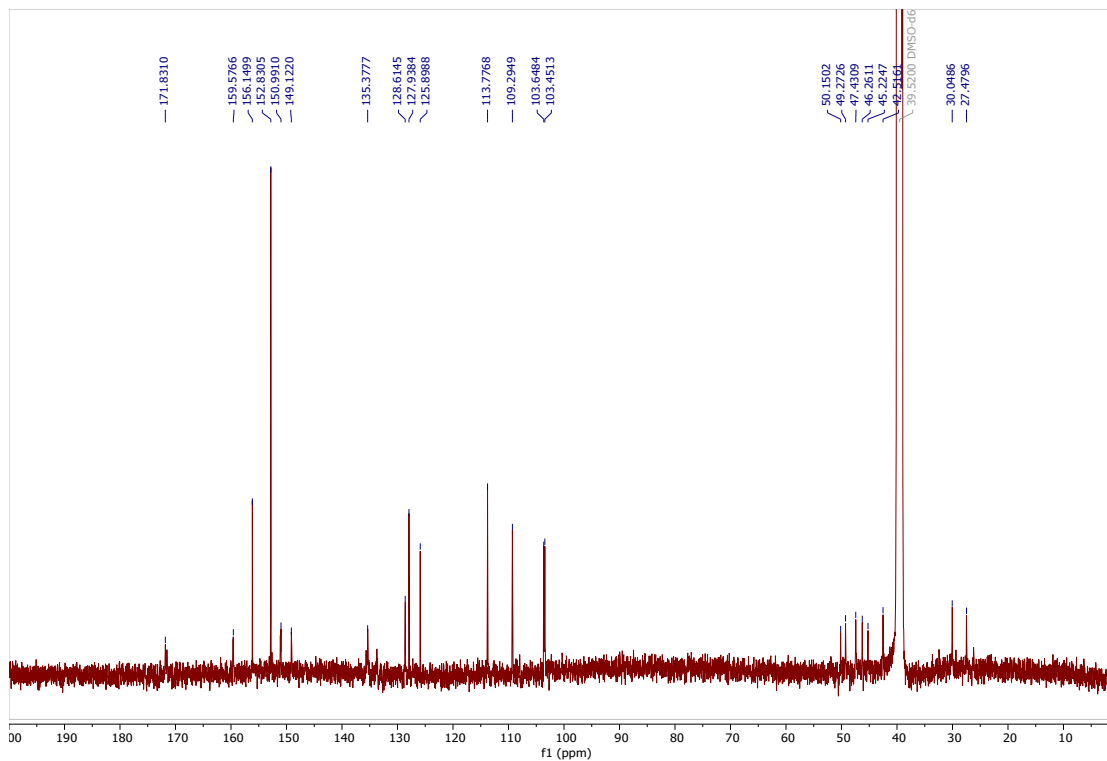

<sup>13</sup>C NMR spectrum of CU08 (DMSO-*d*<sub>6</sub>)

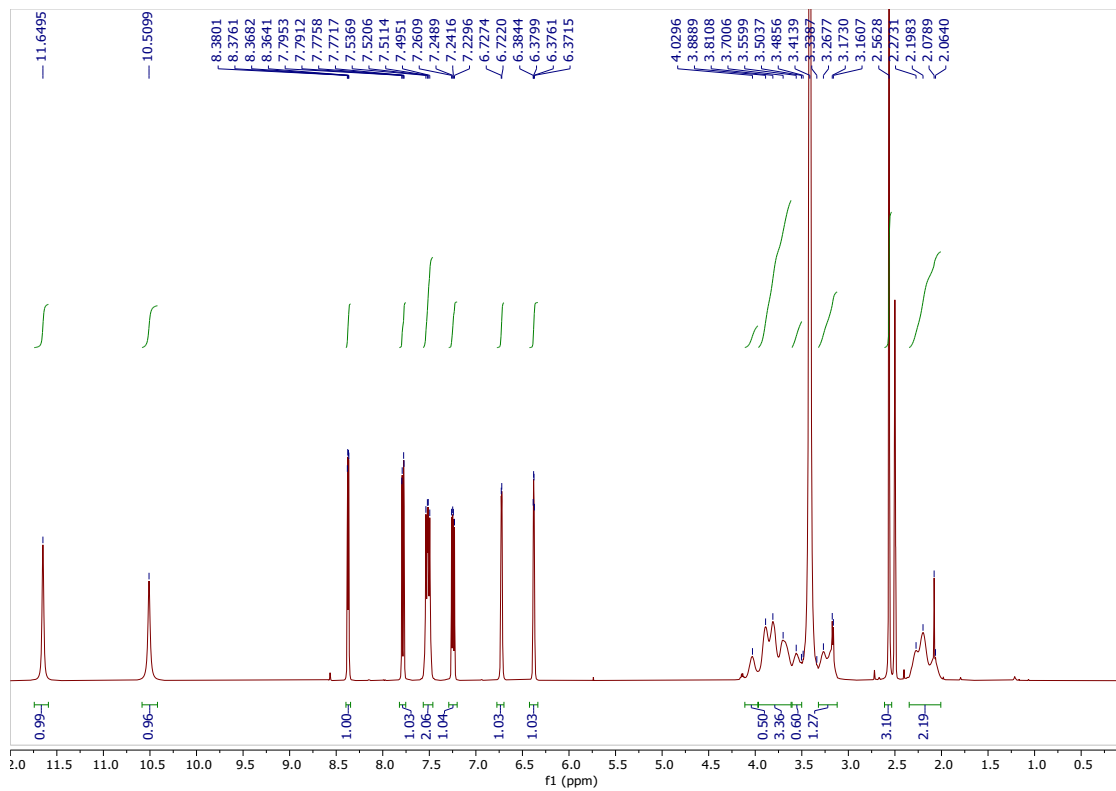

<sup>1</sup>H NMR spectrum of CU09 (DMSO-d<sub>6</sub>)

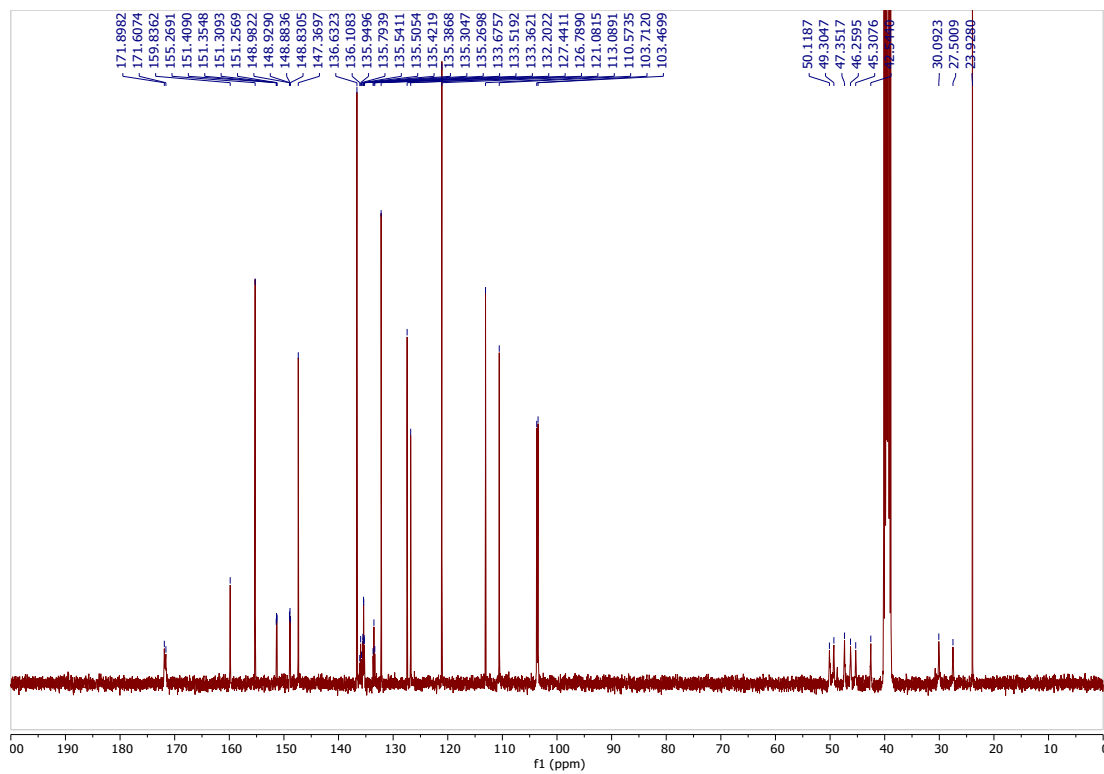

<sup>13</sup>C NMR spectrum of CU09 (DMSO-d<sub>6</sub>)

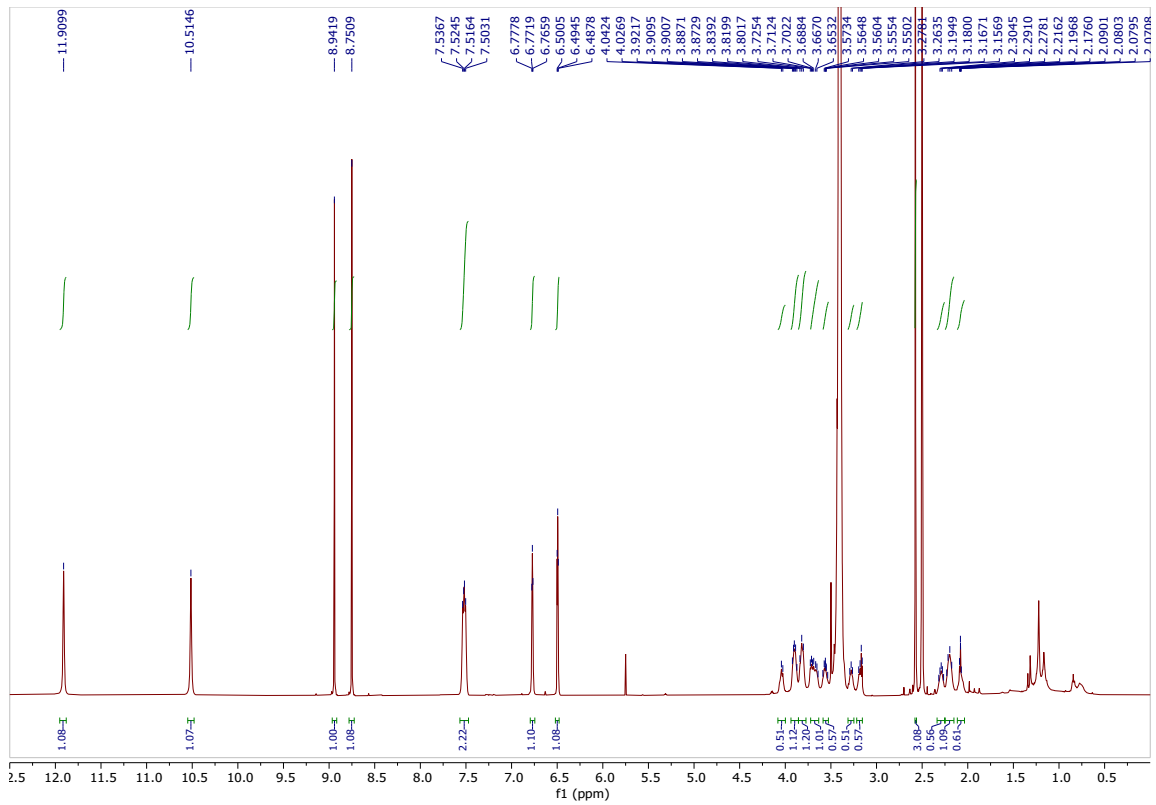

<sup>1</sup>H NMR spectrum of CU10 (DMSO-d<sub>6</sub>)

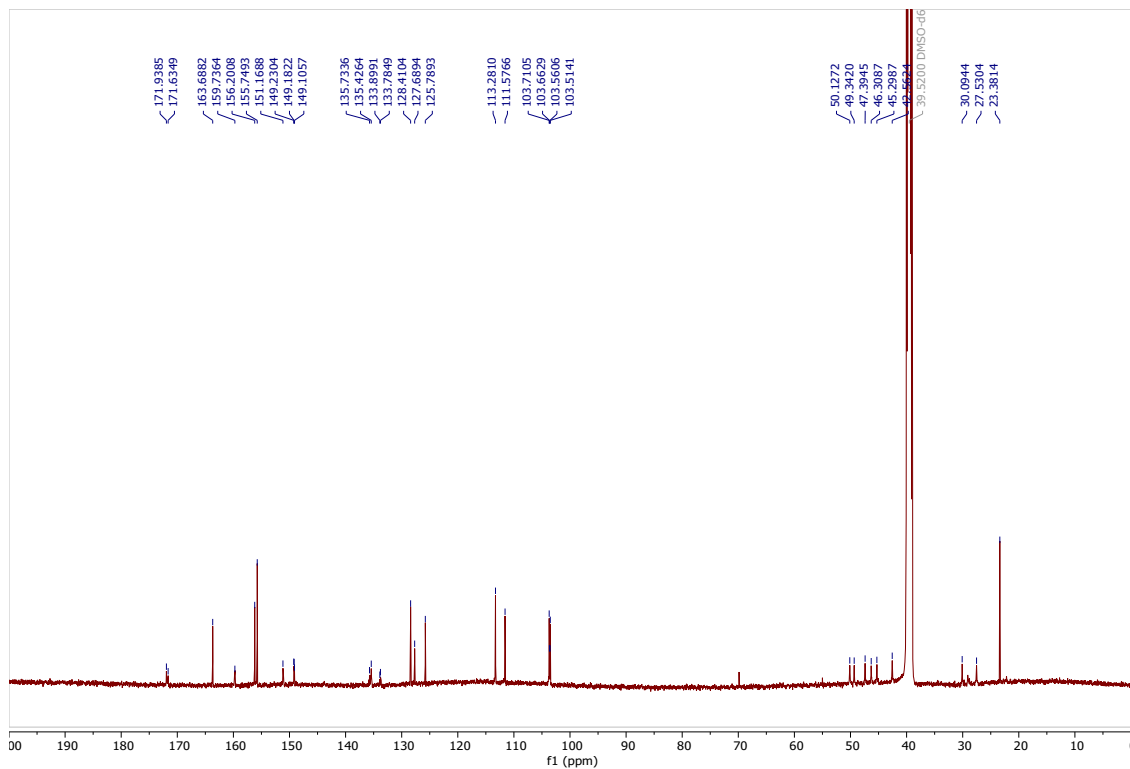

$^{13}\text{C}$  NMR spectrum of CU10 (DMSO- $d_6$ )

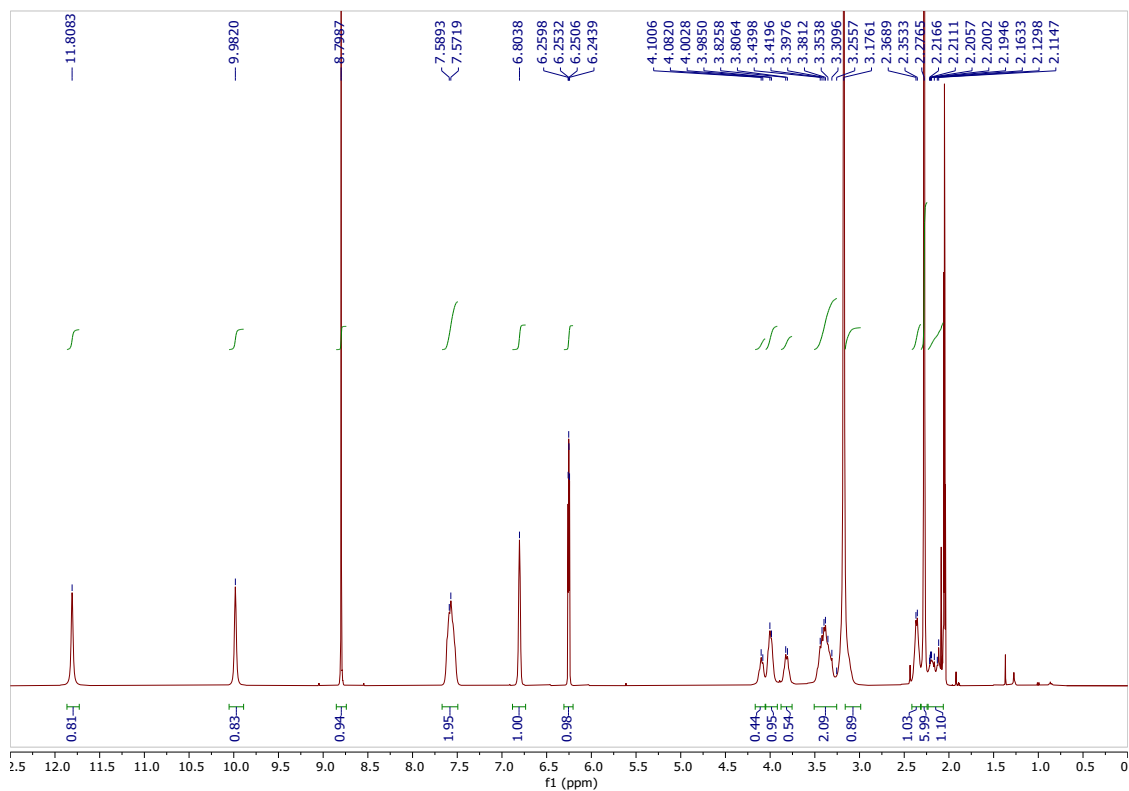

$^1\text{H}$  NMR spectrum of CU11 (Acetone- $d_6$ )

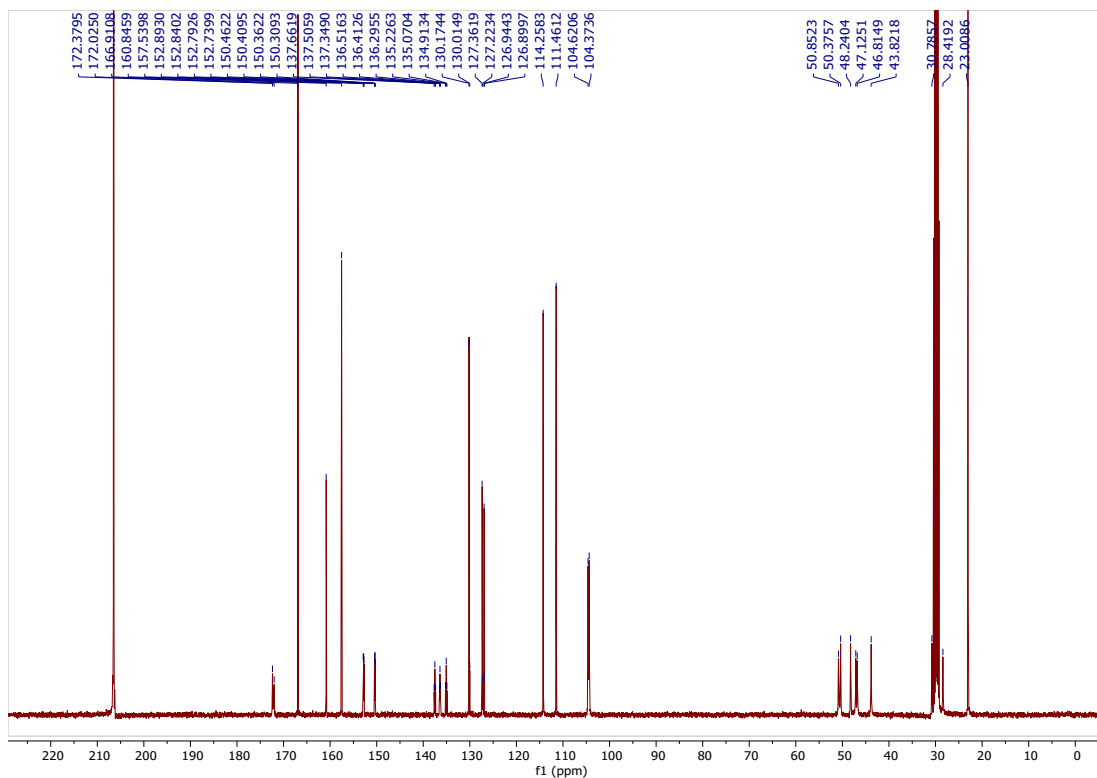

<sup>13</sup>C NMR spectrum of CU11 (Acetone-d<sub>6</sub>)

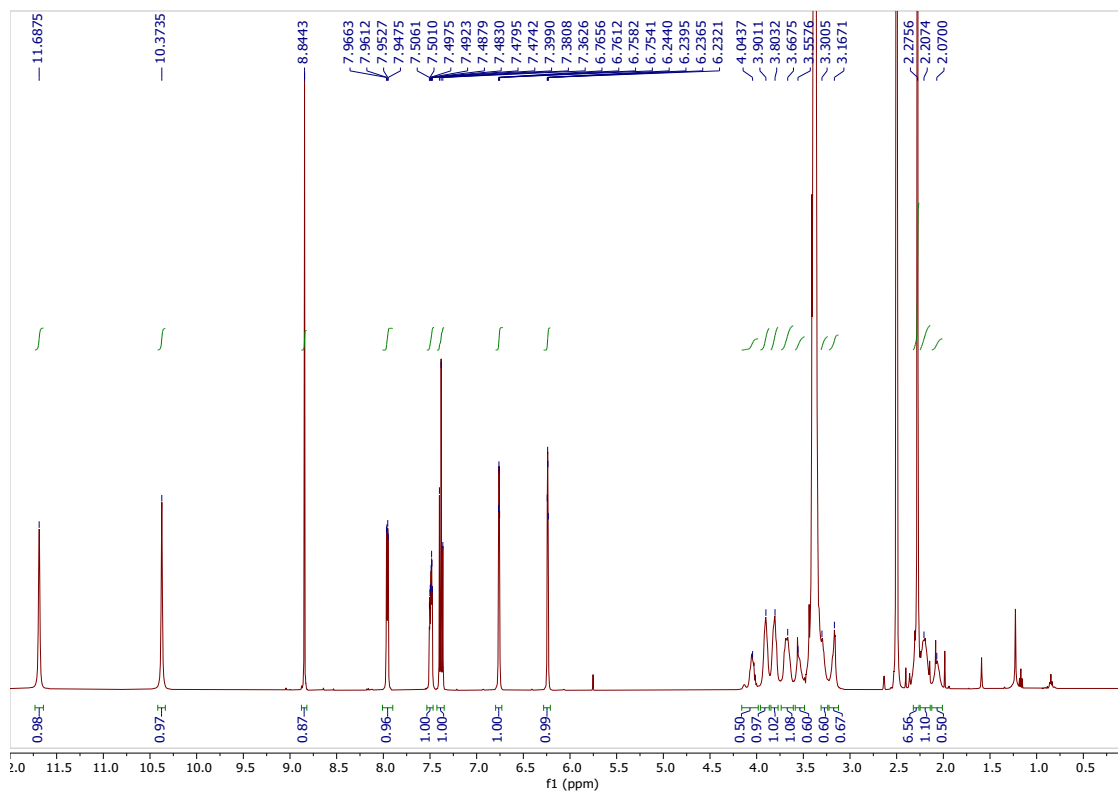

<sup>1</sup>H NMR spectrum of CU12 (Acetone-d<sub>6</sub>)

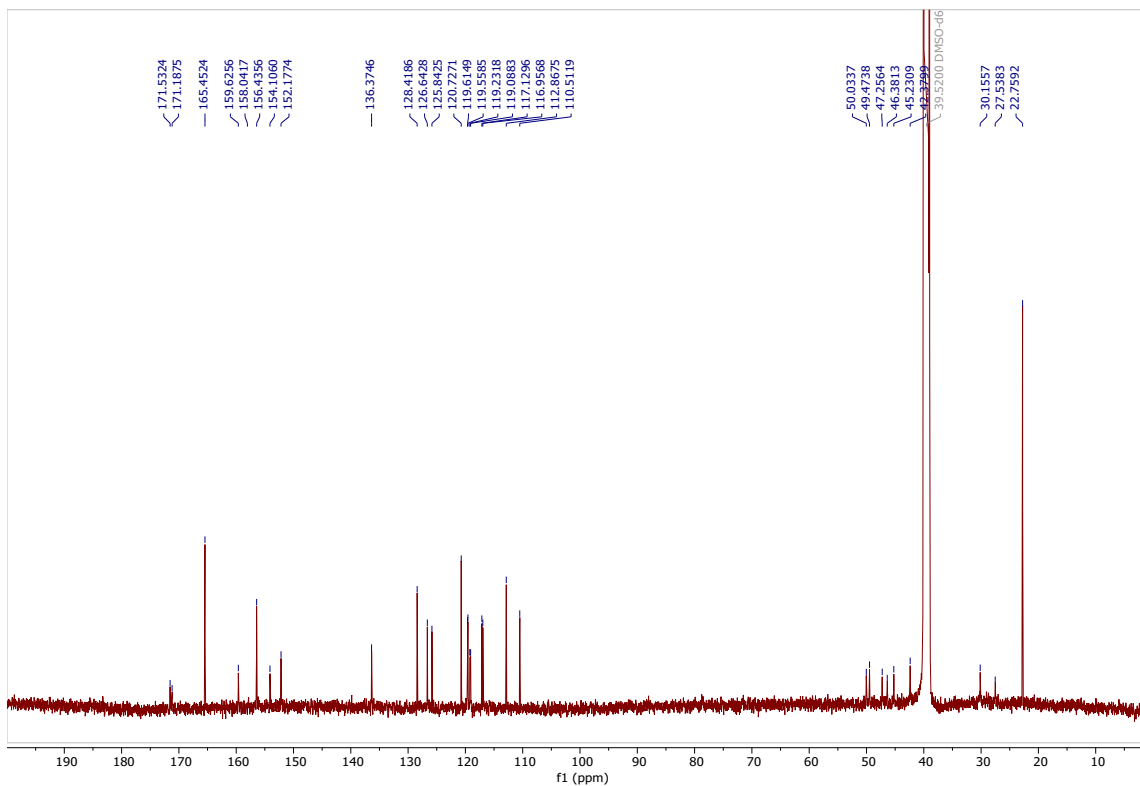

<sup>13</sup>C NMR spectrum of CU12 (Acetone-d<sub>6</sub>)

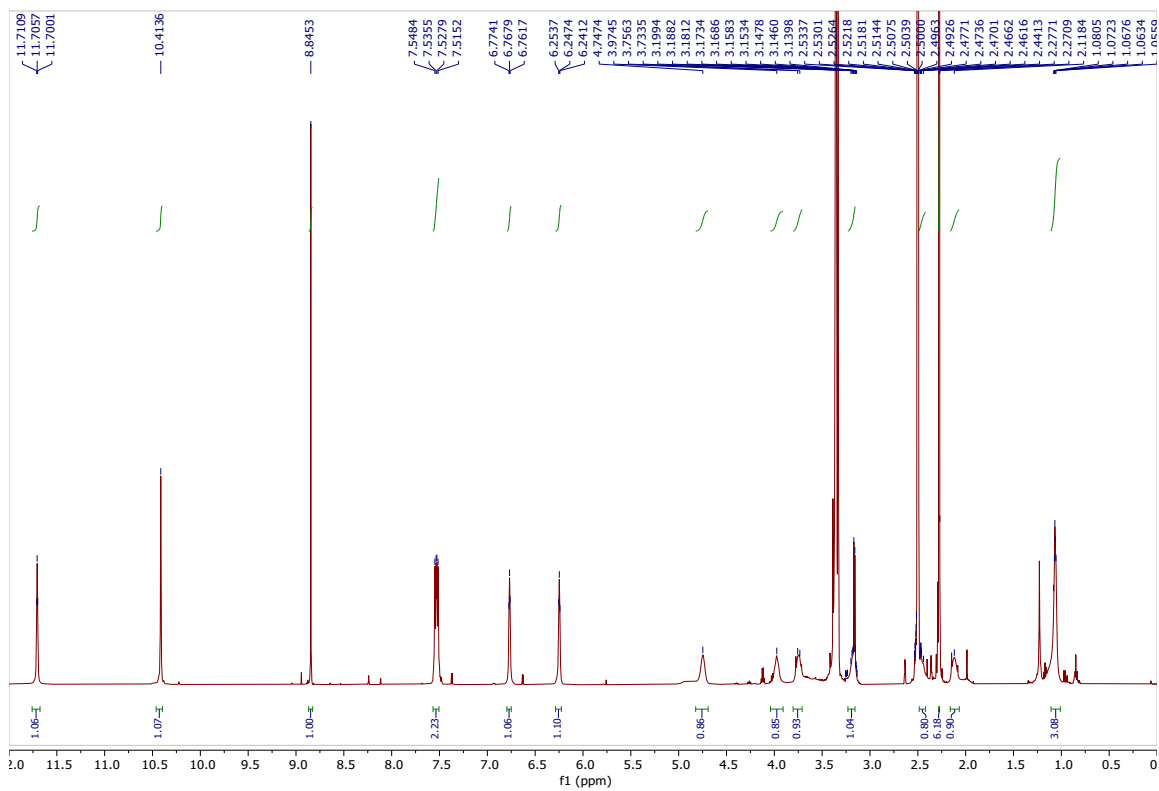

<sup>1</sup>H NMR spectrum of CU13 (Acetone-d<sub>6</sub>)

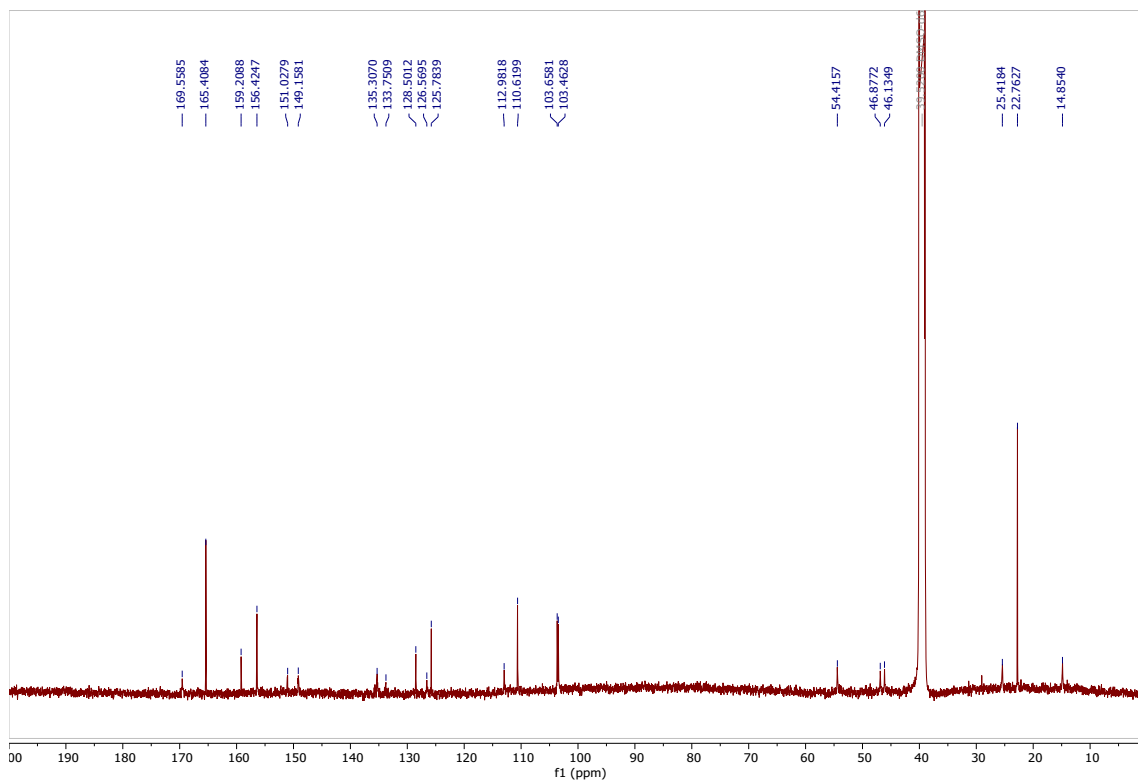



$^{13}\text{C}$  NMR spectrum of CU13 (Acetone- $d_6$ )

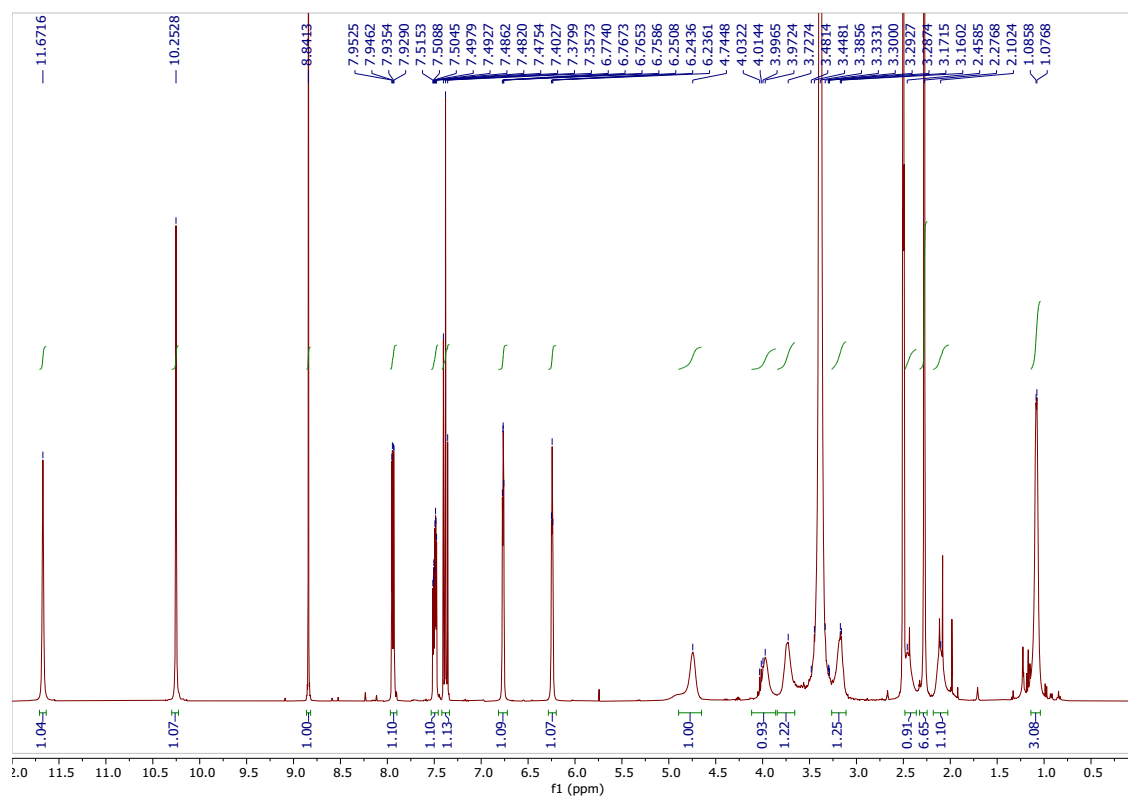

$^1\text{H}$  NMR spectrum of CU14 (DMSO- $d_6$ )

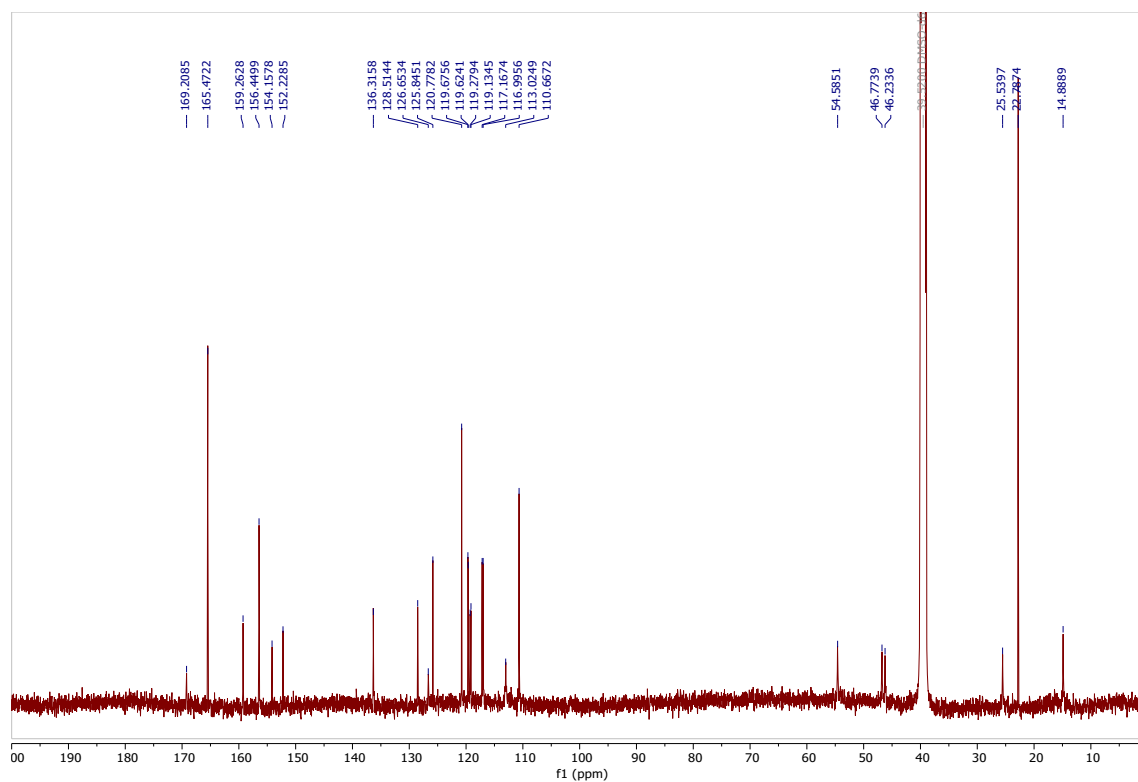

$^{13}\text{C}$  NMR spectrum of CU14 (DMSO- $d_6$ )

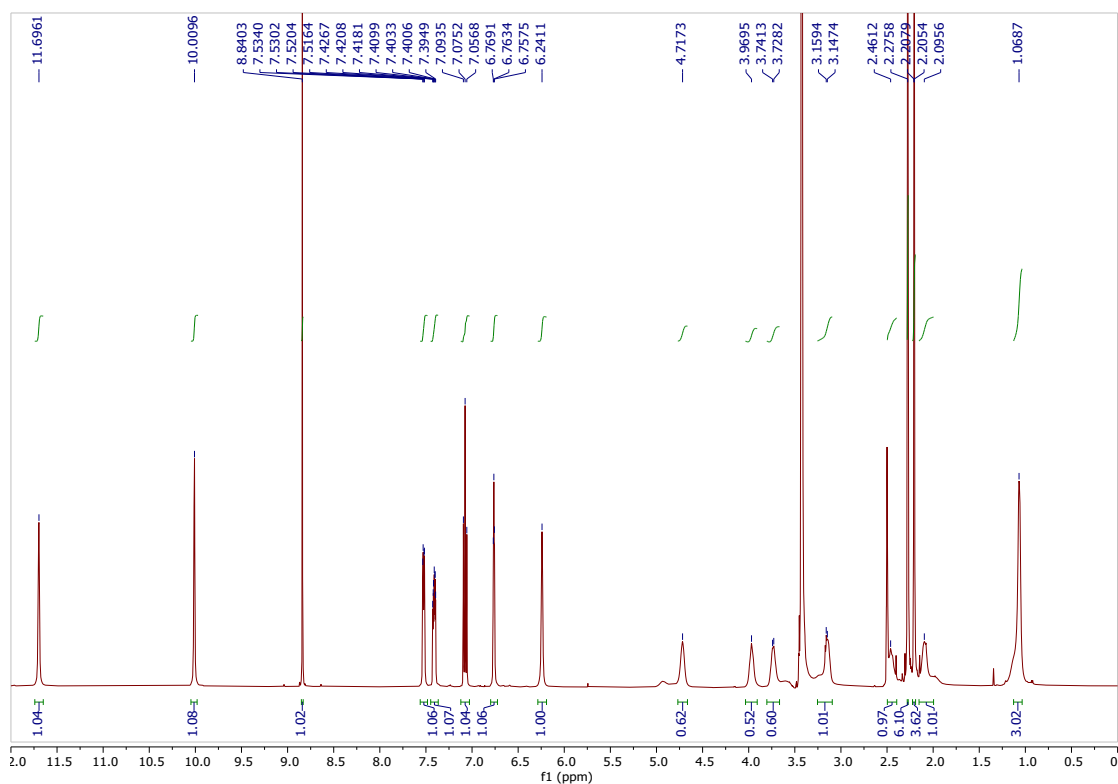

$^1\text{H}$  NMR spectrum of CU15 (DMSO- $d_6$ )

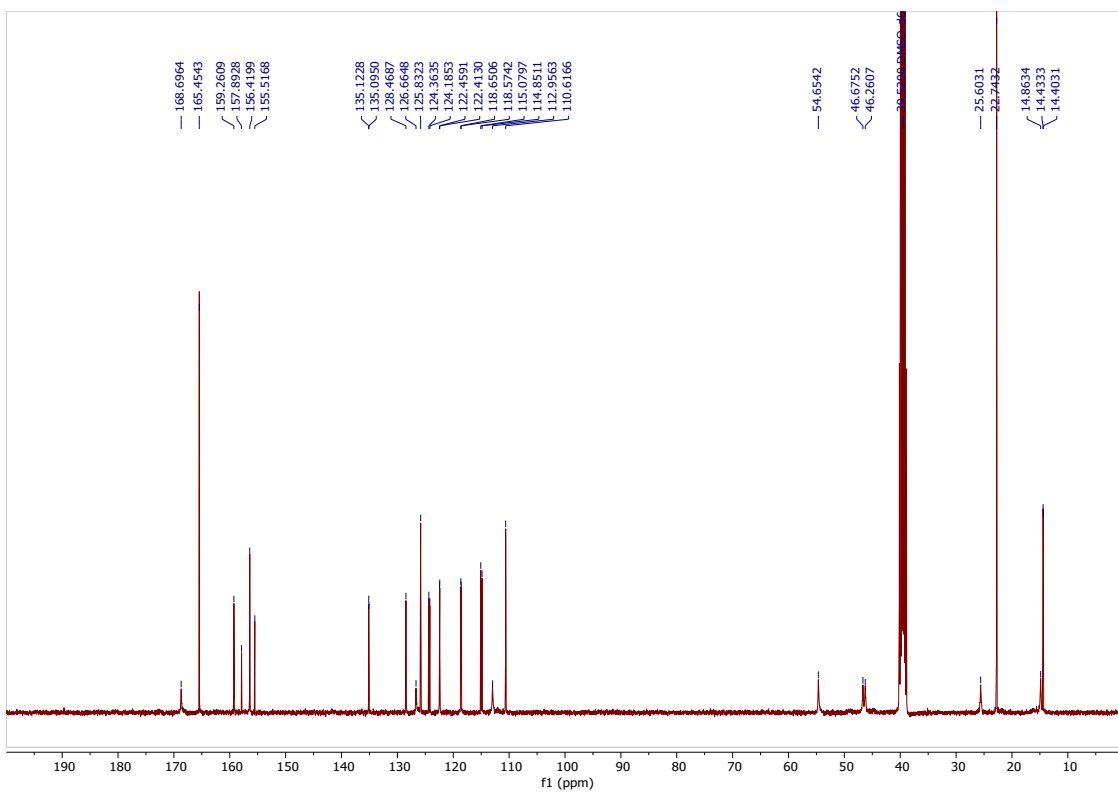

### $^{13}\text{C}$ NMR spectrum of CU15 (DMSO- $d_6$ )

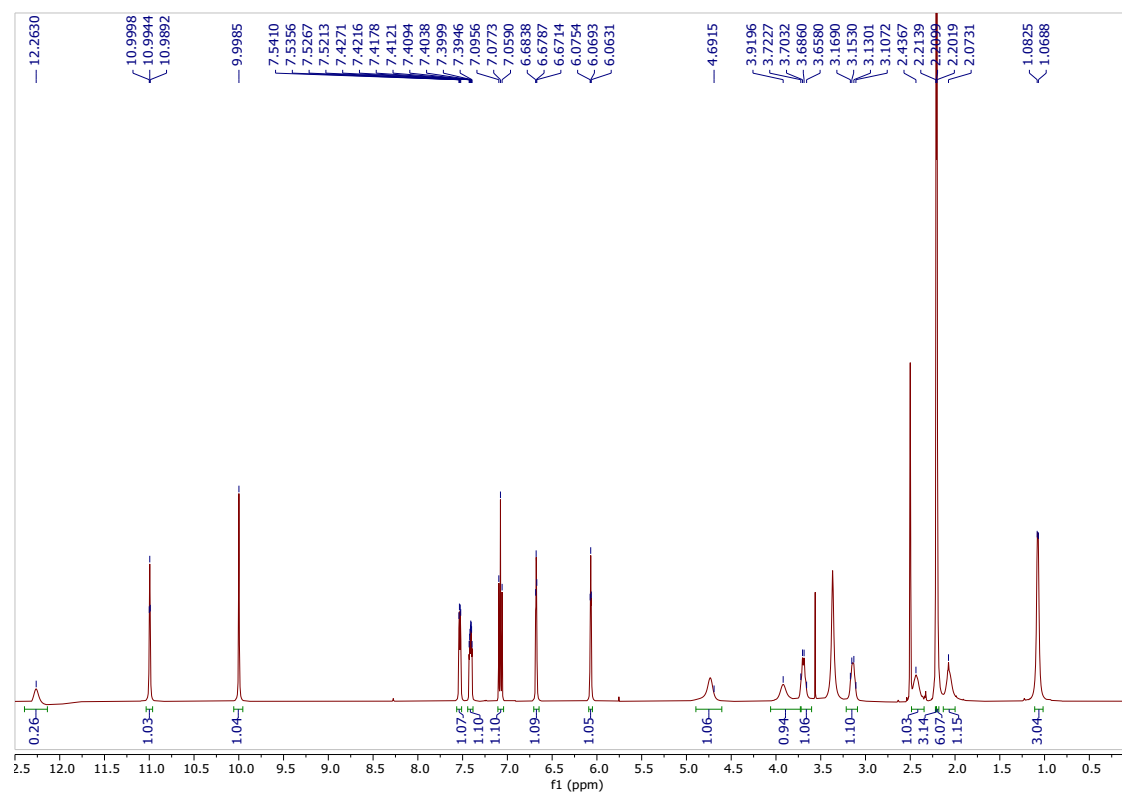

### $^1\text{H}$ NMR spectrum of CU16 (DMSO- $d_6$ )

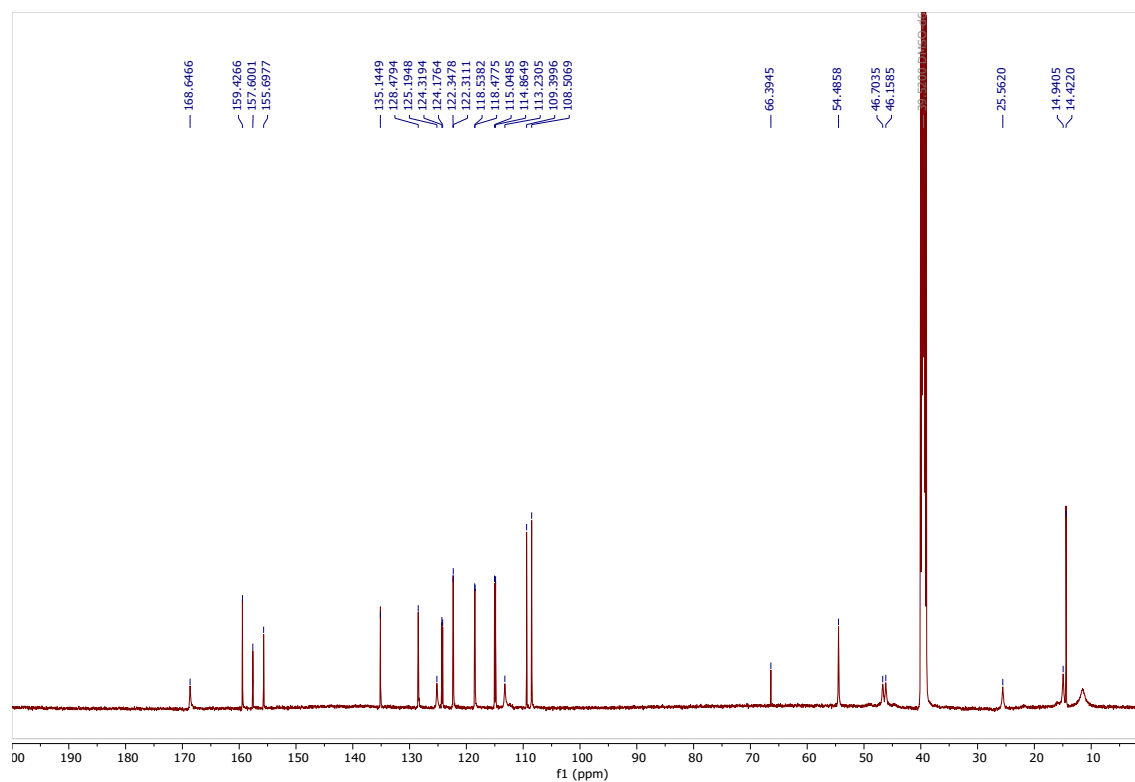

$^{13}\text{C}$  NMR spectrum of **CU16** ( $\text{DMSO-}d_6$ )
